# 1 Inferring Neural Activity Before Plasticity: A Foundation 2 for Learning Beyond Backpropagation

3 Yuhang Song<sup>1,2,\*</sup>, Beren Millidge<sup>2</sup>, Tommaso Salvatori<sup>1</sup>, Thomas Lukasiewicz<sup>1,\*</sup>, Zhenghua Xu<sup>1,3</sup>, and  
4 Rafal Bogacz<sup>2,\*</sup>

5 <sup>1</sup>Department of Computer Science, University of Oxford, Oxford, United Kingdom

6 <sup>2</sup>Medical Research Council Brain Networks Dynamics Unit, University of Oxford, Oxford, United Kingdom

7 <sup>3</sup>State Key Laboratory of Reliability and Intelligence of Electrical Equipment, Hebei University of Technology, Tianjin, China

8 \*Corresponding authors: yuhang.song@bndu.ox.ac.uk; thomas.lukasiewicz@cs.ox.ac.uk; rafal.bogacz@ndcn.ox.ac.uk

## 9 Abstract

10 For both humans and machines, the essence of learning is to pinpoint which components in its information processing pipeline are responsible for an error in its output — a challenge that is known as *credit assignment*<sup>1</sup>. How the brain solves credit assignment is a key question in neuroscience, and also of significant importance for artificial intelligence. Many recent studies<sup>1–12</sup> presuppose that it is solved by backpropagation<sup>13–16</sup>, which is also the foundation of modern machine learning<sup>17–22</sup>. However, it has been questioned whether it is possible for the brain to implement backpropagation<sup>23,24</sup>, and learning in the brain may actually be more efficient and effective than backpropagation<sup>25</sup>. Here, we set out a fundamentally different principle on credit assignment, called *prospective configuration*. In prospective configuration, the network first infers the pattern of neural activity that should result from learning, and then the synaptic weights are modified to consolidate the change in neural activity. We demonstrate that this distinct mechanism, in contrast to backpropagation, (1) underlies learning in a well-established family of models of cortical circuits, (2) enables learning that is more efficient and effective in many contexts faced by biological organisms, and (3) reproduces surprising patterns of neural activity and behaviour observed in diverse human and animal learning experiments. Our findings establish a new foundation for learning beyond backpropagation, for both understanding biological learning and building artificial intelligence.

11 The credit assignment problem<sup>1</sup> lies at the very heart of learning. *Backpropagation*<sup>13–16</sup>, as a simple  
12 yet effective credit assignment theory, has powered notable advances in artificial intelligence since its  
13 inception<sup>17–22</sup>. It has also gained a predominant place in understanding learning in the brain<sup>1,2,4–9,11,12,26</sup>.  
14 Due to this success, much recent work has focused on understanding how biological neural networks  
15 could learn in a way similar to backpropagation<sup>27–36</sup>: although many proposed models do not implement  
16 backpropagation exactly, they nevertheless try to approximate backpropagation, and much emphasis  
17 is placed on how close this approximation is<sup>3,27–33,37,38</sup>. However, learning in the brain is superior  
18 to backpropagation in many critical aspects — for example, compared to the brain, backpropagation  
19 requires many more exposures to a stimulus to learn<sup>25</sup> and suffers from catastrophic interference of newly  
20 and previously stored information<sup>39,40</sup>. This raises the question of whether using backpropagation to  
21 understand learning in the brain should be the main focus of the field.

22 Here, we propose that the brain instead solves credit assignment with a fundamentally different  
23 principle, which we call *prospective configuration*. In prospective configuration, before synaptic weights  
24 are modified, neural activity changes across the network so that output neurons better predict the target  
25 output; only then are the synaptic weights (weights, for short) modified to consolidate this change in  
26 neural activity. By contrast, in backpropagation the order is reversed — weight modification takes the lead

27 and the change in neural activity is the result that follows.

28 We identify prospective configuration as a principle that is implicitly followed by a well-established  
29 family of neural models with solid biological groundings, namely, energy-based networks. They include  
30 Hopfield networks<sup>41</sup> and predictive coding networks<sup>42</sup>, which have been successfully used to describe  
31 information processing in the cortex<sup>43–49</sup>. To support the theory of prospective configuration, we show  
32 that it can both yield efficient learning, which humans and animals are capable of, and reproduce data  
33 from experiments on human and animal learning. Thus, on one hand, we demonstrate that prospective  
34 configuration performs more efficient and effective learning than backpropagation in various situations  
35 faced by biological systems, such as learning with deep structures, online learning, learning with a  
36 limited amount of training examples, learning in changing environments, continual learning with multiple  
37 tasks, and reinforcement learning. On the other hand, we demonstrate that patterns of neural activity  
38 and behaviour in diverse human and animal learning experiments, including sensorimotor learning, fear  
39 conditioning and reinforcement learning, can be naturally explained by prospective configuration, but not  
40 by backpropagation.

41 Guided by the belief that backpropagation is the foundation of biological learning, previous work  
42 showed that energy-based networks can closely approximate backpropagation. However, to achieve it, the  
43 networks were set up in an unnatural way, such that the neural activity was prevented from substantially  
44 changing before weight modification, by constraining the supervision signal to be infinitely small or last  
45 an infinitely short time<sup>29,30,37,50,51</sup>. In contrast, we reveal that the energy-based networks without these  
46 unrealistic constraints follow the distinct principle of prospective configuration rather than backpropagation,  
47 and are superior in both learning efficiency and accounting for data on biological learning.

48 Below, we first introduce prospective configuration with an intuitive example, show how it originates  
49 from energy-based networks, describe its advantages and quantify them in a rich set of biological-relevant  
50 learning tasks. Finally, we show that it naturally explains patterns of neural activity and behaviour in  
51 diverse learning experiments.

## 52 **Results**

### 53 **Prospective configuration: an intuitive example**

54 To optimally plan behaviour, it is critical for the brain to predict future stimuli — for example, to predict  
55 sensations in some modalities on the basis of other modalities<sup>52</sup>. If the observed outcome differs from the  
56 prediction, the weights in the whole network need to be updated so that prediction in the “output” neurons  
57 are corrected. Backpropagation computes how the weights should be modified to minimize the error on  
58 the output, and this weight update results in the change of neural activity when the network next makes the  
59 prediction. In contrast, we propose that the activity of neurons is first adjusted to a new configuration, so  
60 that the output neurons better predict the observed outcome (target pattern); the weights are then modified  
61 to reinforce this configuration of neural activity. We call this configuration of neural activity “prospective”,  
62 since it is the neural activity that the network *should produce* to correctly predict the observed outcome. In  
63 agreement with the proposed mechanism of prospective configuration, it has indeed been widely observed  
64 in biological neurons that presenting outcome of a prediction triggers changes in neural activity — for  
65 example, in tasks requiring animals to predict a fruit juice delivery, the reward triggers rapid changes in  
66 activity not only in the gustatory cortex, but also in multiple cortical regions<sup>53,54</sup>.

67 To highlight the difference between backpropagation and prospective configuration, consider a simple  
68 example in Fig. 1a. Imagine a bear seeing a river. In the bear’s mind, the sight generates predictions  
69 of hearing water and smelling salmon. On that day, the bear indeed smelled the salmon but did not  
70 hear the water, perhaps due to an ear injury, and thus the bear needs to change its expectation related

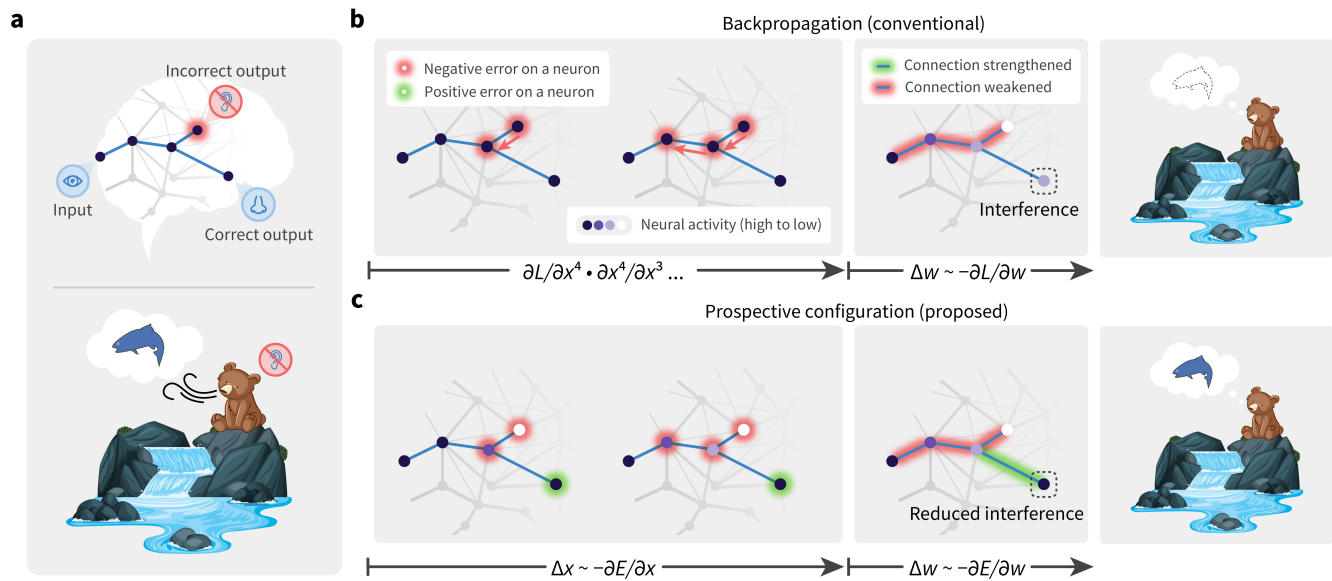

**Fig. 1 | Prospective configuration avoids interference during learning.** ▶ **a** | An abstract (top) and a concrete (bottom) example of a task inducing interference during learning. One stimulus input (seeing the water) triggers two prediction outputs (hearing the water and smelling the salmon). One output is correct (smelling the salmon), while the other one is an error (not hearing the water). Backpropagation produces interference during learning: not hearing the water reduces the expectation of smelling the salmon (panel b), although the salmon was indeed smelled. Prospective configuration, on the other hand, avoids such interference (panel c). ▶ **b** | In backpropagation, negative error propagates from the error output into hidden neurons (left). This causes a weakening of some connections, which on the next trial improves the incorrect output, but it also reduces the prediction of the correct output, thus introducing interference (middle and right). ▶ **c** | In prospective configuration, neural activity settles into a new configuration (purple of different intensity) before weight modification (left). This configuration corresponds to the activity that should be produced after learning, i.e., is “prospective”. Hence it foresees the positive error on the correct output, and modifies the connections to improve the incorrect output, while maintaining the correct output (middle and right).

71 to the sound. Backpropagation (Fig. 1b) would proceed by backpropagating the negative error, so as  
 72 to reduce the weights on the path between the visual and auditory neurons. However, this modification  
 73 would also reduce the expectation of smelling the salmon the next time the river is visited, even though  
 74 the smell of salmon was present and correctly predicted. These undesired and unrealistic side effects  
 75 of learning with backpropagation are closely related with the phenomenon of catastrophic interference,  
 76 where learning a new association destroys previously learned memories<sup>39,40</sup>. This example shows that,  
 77 with backpropagation, even learning one new aspect of an association may interfere with the memory of  
 78 other aspects of the same association.

79 In contrast, prospective configuration assumes that learning starts ▶ with the neurons being configured  
 80 to a new state — which corresponds to a pattern enabling the network to correctly predict the observed  
 81 outcome. The weights are then modified to consolidate this state. This behaviour can “foresee” side  
 82 effects of potential weight modifications and compensate for them dynamically — Fig. 1c: to correct the  
 83 negative error on the incorrect output, the hidden neurons settle to their prospective state of lower activity,  
 84 and as a result, a positive error is revealed and allocated to the correct output. Consequently, prospective  
 85 configuration increases the weights connecting to the correct output, while backpropagation does not  
 86 (cf. middle plots of Fig. 1b and c). Hence, prospective configuration is able to correct the side effects of  
 87 learning an association effectively, efficiently, and with little interference.

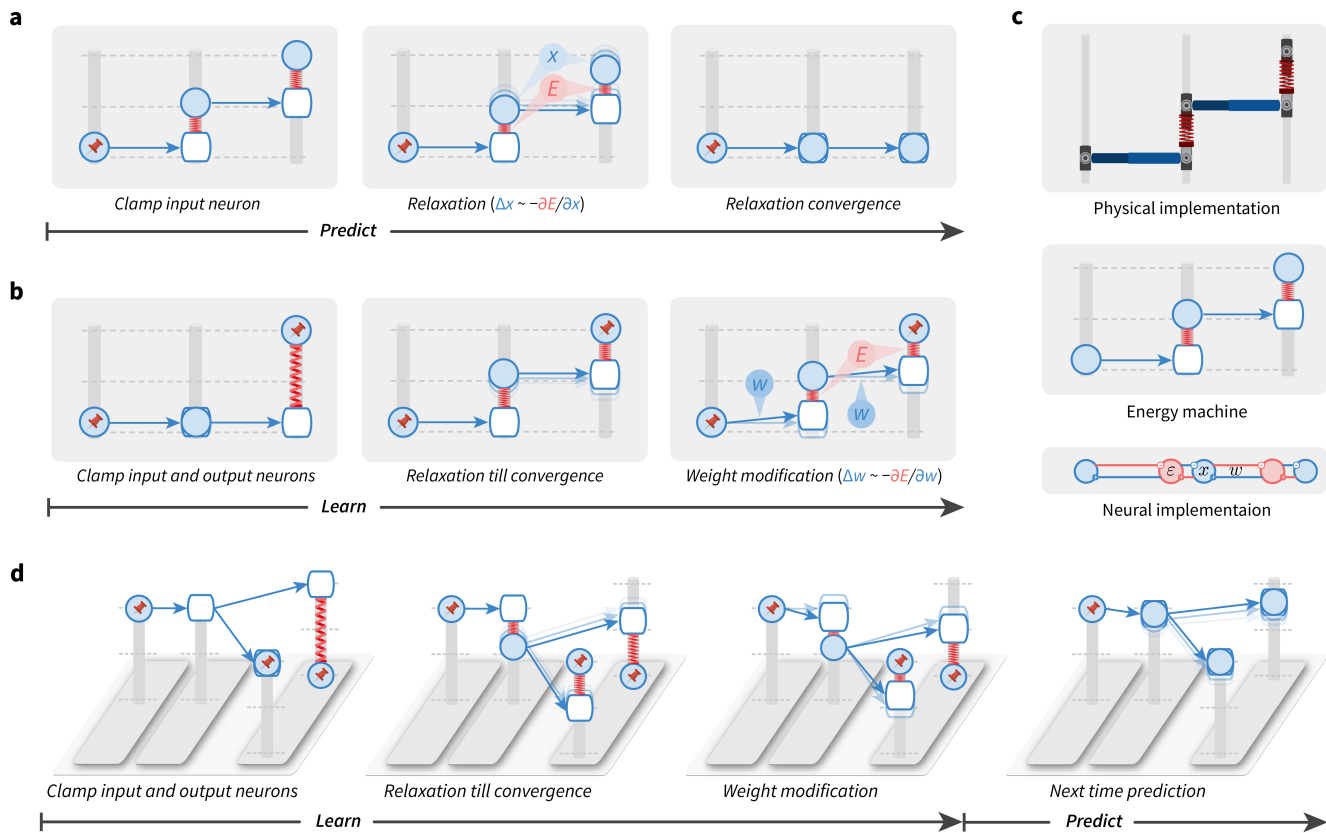

**Fig. 2| The energy machine reveals a new understanding of energy-based networks, the mechanism of prospective configuration, and its theoretical advantages.** A subset of energy-based networks can be visualized as mechanical machines that perform equivalent computations. Here, we present one of them, predictive coding networks<sup>30,43,55</sup>. In the energy machine, the activity of a neuron corresponds to a height of a node (represented by a solid circle) sliding on a post. The input to the neuron is represented by a hollow node on the same post. A synaptic connection corresponds to a rod pointing from a solid to a hollow node. The synaptic weight determines how the input to a post-synaptic neuron depends on the activity of pre-synaptic neuron, hence it influences the angle of the rod. In these energy-based networks, the activity of a neuron is not fixed to its input, instead, an energy function is defined, which is equivalent to an elastic potential energy of springs connecting nodes on the posts (the natural length of the springs is zero). In energy-based networks, relaxation (i.e., neural dynamics) and weight modification (i.e., weight dynamics) are both driven by minimizing the energy, thus correspond to relaxing the energy machine by moving the nodes and tuning the rods, respectively. ▶ **a-b**| Predictions (a) and learning (b) in energy-based networks, visualized by the energy machine. The pin indicates that the neural activity is fixed to the input or target pattern. Here, it is revealed that the relaxation infers the prospective neural activity, towards which the weights are then modified, a mechanism that we call prospective configuration. ▶ **c**| The physical implementation (top) and the connectivity of a predictive coding network<sup>30,43,55</sup> (bottom), which has a dynamics mathematically equivalent to the energy machine in the middle (see Methods for details). ▶ **d**| The learning problem in Fig. 1, visualized by the energy machine, which learns to improve the incorrect output while not interfering with the correct output, thanks to the mechanism of prospective configuration.

## 88 Origin of prospective configuration: energy-based networks

89 To show how prospective configuration naturally arises in energy-based networks, we introduce a physical  
 90 machine analog, that provides an intuitive understanding of energy-based networks, and how they produce  
 91 the mechanism of prospective configuration.

92 Energy-based networks have been widely and successfully used in describing biological neural



93 systems<sup>41,42,56–58</sup>. In these models, a neural circuit is described by a dynamical system driven by reducing  
94 an abstract “energy”, e.g., reflecting errors made by the neurons; see Methods. Neural activity and synaptic  
95 weights change to reduce this energy, hence they can be considered as “movable parts” of the dynamical  
96 system. We show below that energy-based networks are mathematically equivalent to a physical machine  
97 (we call it *energy machine*), where the energy function has an intuitive interpretation and its dynamics are  
98 straightforward — the energy machine simply adjusts its movable parts to reduce energy.

99 As shown in Fig. 2a–b, the energy machine includes nodes sliding on vertical posts, connected with  
100 each other via rods and springs. Translating from energy-based networks to the energy machine, the neural  
101 activity maps to the vertical position of a solid node, a connection maps to a rod (blue arrow) pointing  
102 from one node to another (where the weight determines how the end position of the rod relates to the initial  
103 position), and the energy function maps to the elastic potential energy of springs with nodes attached  
104 on their both ends (the natural length of the springs is zero). Different energy functions and networks  
105 structures result in different energy-based networks, corresponding to energy machines with different  
106 configurations and combinations of nodes, rods, and springs. In Fig. 2, we present the energy machine of  
107 predictive coding networks<sup>30,43,55</sup>, because they are most accessible and established to be closely related  
108 to backpropagation<sup>30,37</sup>.

109 The dynamics of energy-based networks, which are driven by minimizing the energy function, maps to  
110 the relaxation of the energy machine, which is driven by reducing the total elastic potential energy on the  
111 springs. A prediction with energy-based networks involves clamping the input neurons to the provided  
112 stimulus and updating the activity of the other neurons, which corresponds to fixing one side of the energy  
113 machine and letting the energy machine relax by moving nodes (Fig. 2a). Learning with energy-based  
114 networks involves clamping the input and output neurons to the corresponding stimulus, first letting the  
115 activity of the remaining neurons converge and then updating weights, which corresponds to fixing both  
116 sides of the energy machine and letting the energy machine relax first by moving nodes and then by tuning  
117 rods (Fig. 2b).

118 The energy machine reveals the essence of energy-based networks: the relaxation before weight  
119 modification lets the network settle to a new configuration of neural activity, corresponding to those that  
120 would have occurred after the error was corrected by the modification of weights, i.e., prospective activity  
121 (thus, we call this mechanism prospective configuration). For example, the second layer “neuron” in  
122 Fig. 2b increases its activity, and this increase in activity would also be caused by the subsequent weight  
123 modification (of the connection between the first and the second neurons). In simple terms, the relaxation  
124 in energy-based networks infers the prospective neural activity after learning, towards which the weights  
125 are then modified. This distinguishes it from backpropagation, where the weights modification takes the  
126 lead, and the change in neural activity is the result that follows.

127 The bottom part of Fig. 2c shows the connectivity of a predictive coding network<sup>30,43,55</sup>, which has a  
128 dynamics mathematically equivalent to the energy machine shown above it. Predictive coding networks  
129 include neurons (blue) corresponding to nodes on the posts, and separate neurons encoding prediction  
130 errors (red) corresponding to springs, (see Methods for details).

131 Using the energy machine, Fig. 2d simulates the learning problem from Fig. 1. Here, we can see that  
132 prospective configuration indeed foresees the result of learning and its side effects, through relaxation.  
133 Hence, it learns to avoid interference within one iteration, which would otherwise take multiple iterations  
134 for backpropagation.

### 135 **Advantages of prospective configuration: reduced interference and faster learning**

136 Here we quantify interference in the above scenario and demonstrate how the reduced interference  
137 translates into an advantage in performance. In all simulations in the main text prospective configuration

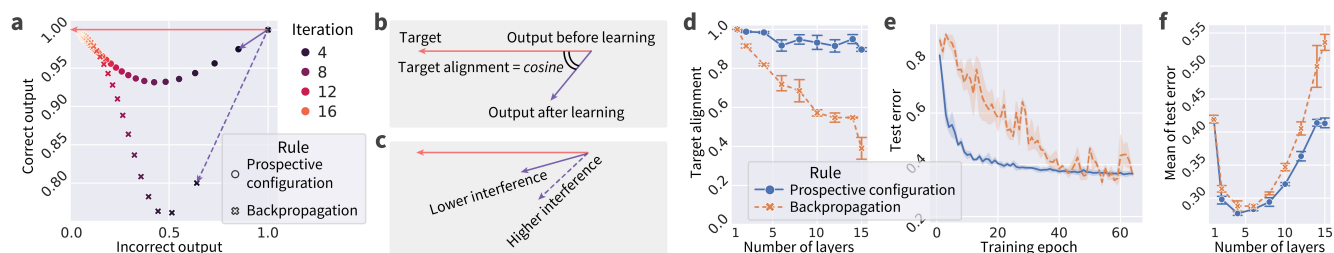

**Fig. 3 | Learning with prospective configuration changes the activity of output neurons in a direction more aligned towards the target.** ▶ **a** | Simulation of network from Fig. 1 showing changes of the correct and incorrect output neurons during training (“Iteration”), trained with both learning rules. Here, learning with prospective configuration (purple solid vector) aligns better with the target (red vector), than for backpropagation (purple dashed vector). ▶ **b** | The interference can be quantified by “target alignment”: the cosine similarity of the direction of target (red vector) and the direction of learning (purple vector). ▶ **c** | Higher target alignment indicates less interference and vice versa. ▶ **d** | Target alignment of randomly generated networks trained with both learning rules, as a function of depth of the network. Here, target alignment drops as the network gets deeper, demonstrating the difficulty of training deep structures. However, prospective configuration maintains much higher target alignment along the way. ▶ **e** | Classification error during training on FashionMNIST dataset containing images of clothing belonging to different categories, for both learning rules, with a deep neural network of 15 layers. ▶ **f** | Mean of classification error plot in panel e (reflecting how fast test error drops) and of other network depths. In panels e-f, prospective configuration demonstrates notable advantage as the structure gets deep.

138 is implemented in predictive coding networks (see Methods). Fig. 3a compares the activity of output  
 139 neurons in the example in Fig. 1, between backpropagation and prospective configuration. Initially both  
 140 output neurons are active (top right corner), and the output should change towards a target in which one  
 141 of the neurons is inactive (red vector). Learning with prospective configuration results in changes on the  
 142 output (purple solid vector) that are aligned better with the target than those for backpropagation (purple  
 143 dotted vector). Although the output from backpropagation can reach the target after multiple iterations,  
 144 the output for the “correct neuron” diverges from the target during learning and then comes back - it is  
 145 particularly undesired effect in biological learning, where networks can be “tested” at any point during the  
 146 learning process, because it may lead to incorrect decisions affecting chances for survival. By contrast,  
 147 prospective configuration substantially reduces this effect.

148 The interference can be quantified by the angle between the direction of target and learning, and we  
 149 define “target alignment” as the cosine of this angle (Fig. 3b), hence high interference corresponds to low  
 150 target alignment (Fig. 3c). The difference in target alignment demonstrated in Fig. 3a is also present for  
 151 deeper and larger (randomly generated) networks, as shown in Fig. 3d. When a network has no hidden  
 152 layers, the target alignment is equal to 1 (proved in section 2.2 of Supplementary Information). The  
 153 target alignment drops for backpropagation as the network gets deep, because changes in weights in one  
 154 layer may interfere with changes in other layers (as explained in Fig. 1); while prospective configuration  
 155 maintains a much higher value along the way. This metric directly translates to the efficiency of learning:  
 156 Fig. 3e shows that the test error during training in a visual classification task with a deep neural network  
 157 of 15 layers decreases faster for prospective configuration than backpropagation. Fig. 3f repeats the  
 158 experiment on networks of other depths, and shows the mean of the test error during training (reflecting  
 159 how fast the test error drops), as a function of network depth. The mean error is higher for low depths,  
 160 as these networks are unable to learn the task, and for greater depths, because it takes longer to train  
 161 deeper networks. Importantly, the gap between backpropagation and prospective configuration widens for  
 162 deeper networks, paralleling the difference in target alignment. Efficient training with deeper networks is  
 163 important for biological neural systems, known to be deep, e.g., primate visual cortex<sup>59</sup>.

164 In the Supplementary Information we develop a formal theory of prospective configuration and provide  
165 further illustrations and analyses of its advantages. Extended Data Fig. 1 formally defines prospective  
166 configuration and demonstrates that it is indeed commonly observed in different energy-based networks.  
167 Extended Data Fig. 2 shows that prospective configuration shares a close relationship with another  
168 influential model of credit assignment called target propagation<sup>60</sup>, providing another way of understanding  
169 the advantages of prospective configuration. Extended Data Figs. 3 and 4 empirically verify and generalize  
170 the advantages expected from the theory: they show that prospective configuration yields more accurate  
171 error allocation and less erratic weight modification, respectively.

## 172 **Advantages of prospective configuration: effective learning in biologically relevant scenarios**

173 Inspired by these advantages, we show empirically that prospective configuration indeed handles various  
174 learning problems that biological systems would face better than backpropagation. Since the field of  
175 machine learning has developed effective benchmarks for testing learning performance, we use variants  
176 of classic machine learning problems that share key features with the learning in natural environments.  
177 Such problems include online learning where the weights must be updated after each experience (rather  
178 than a batch of training examples)<sup>61</sup>, learning with limited amount of training examples, learning in  
179 changing environments<sup>62</sup>, continual learning with multiple tasks<sup>63,64</sup>, and reinforcement learning<sup>21</sup>. In all  
180 the aforementioned learning problems, prospective configuration demonstrates a notable superiority over  
181 backpropagation.

182 Firstly, based on the example in Fig. 1, we expect prospective configuration to require fewer episodes  
183 for learning than backpropagation. Before presenting the comparison, we describe how backpropagation  
184 is used to train artificial neural networks. Typically, the weights are only modified after a batch of training  
185 examples, based on the average of updates derived from individual examples (Fig. 4a). In fact, back-  
186 propagation relies heavily on averaging over multiple experiences to reach human-level performance<sup>67-69</sup>  
187 as it needs to stabilise training<sup>70</sup>. By contrast, biological systems must update the weights after each  
188 experience, and we compare the learning performance in such a setting. The sampling efficiency can be  
189 quantified by mean of test error during training, which is shown in Fig. 4b as a function of batch size  
190 (number of experiences that the updates are averaged over). The efficiency strongly depends on batch size  
191 for backpropagation, because it requires batch-training to average out erratic weight updates, while this  
192 dependence is weaker for prospective configuration, where the weight changes are intrinsically less erratic  
193 and the batch-averaging is less required (see Extended Data Fig. 4). Importantly, prospective configuration  
194 learns faster with smaller batch sizes, as in biological settings. Additionally, the final performance can be  
195 quantified by the minimum of the test error, which is shown in Fig. 4c, for both the FashionMNIST and  
196 the CIFAR-10<sup>66</sup> natural image datasets, when trained with batch size equals to one. Here, prospective  
197 configuration also demonstrates a notable advantage over backpropagation.

198 Secondly, biological learning is also characterized by a limited data availability. Fig. 4d show that  
199 prospective configuration outperforms backpropagation when the model is trained with fewer examples.

200 Thirdly, biological systems often need to rapidly adapt to changing environments. A common way  
201 to simulate this is “concept drifting”<sup>62</sup>, where a part of the mapping between the output neurons to the  
202 semantic meaning is shuffled every period of time (Fig. 4e left). Fig. 4e right shows the test error during  
203 training with concept drifting. The advantage of prospective configuration demonstrated here is related to  
204 it being able to optimally detect which weights to modify (see Extended Data Fig. 3). Fig. 4f summarizes  
205 the results and repeat the experiment on CIFAR-10. Here, we can see that prospective configuration learns  
206 better with concept drifting, indicating a better adaptation to changing environments.

207 Furthermore, biological organisms need to sequentially learn multiple tasks, while artificial neural  
208 networks show catastrophic forgetting: when trained on a new task, performance on previously learnt

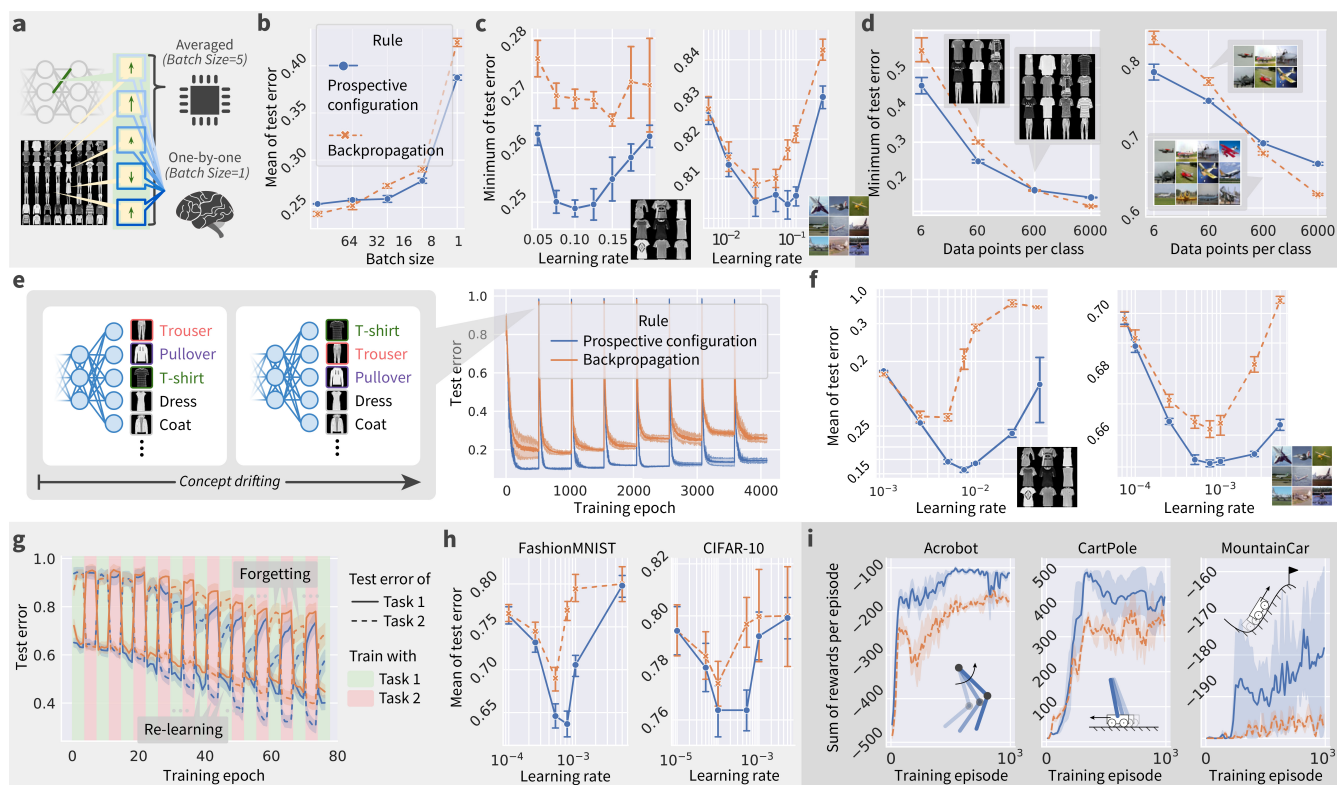

**Fig. 4 | Prospective configuration achieves a superior performance over backpropagation in various learning situations faced by biological systems.** These situations are: online learning<sup>61</sup> (a–d), learning with a limited amount of training examples and limited size of architecture (e–f), learning in changing environments<sup>62</sup> (g–h), continual learning of multiple tasks<sup>63,64</sup> (i–j), reinforcement learning<sup>21</sup> (k). Every supervised learning setup (a–j) is evaluated on both FashionMNIST<sup>65</sup> (default) and CIFAR-10<sup>66</sup> datasets. If the learning rate is not presented in a plot, the plot corresponds to the best learning rate for each rule. ▶ **a** | Difference in training setup between computers that can average weight modifications for individual examples to get a “statistically good” value, and biological systems which must apply one modification before computing another. ▶ **b** | Mean of the test errors during training, as a function of batch size. ▶ **c** | Minimum of the test error during training as a function of learning rate on both datasets. ▶ **d** | Minimum of the test errors during training, with different amounts of training examples (datapoints per class) on both datasets. ▶ **e** | Test error during training when learning with concept drifting. ▶ **f** | Mean of test error during training with concept drifting as a function of learning rate. ▶ **g** | Test error during continual learning of two tasks. ▶ **h** | Mean of test error of both tasks during training as a function of learning rate. ▶ **i** | Sum of rewards per episode during training on three classic reinforcement learning tasks (insets). An episode is a period from initialization of environment to reaching a terminate state.

209 tasks is largely destroyed<sup>39,71–73</sup>. Fig. 4g shows the performance when trained on two tasks alternately  
 210 (task 1 is classifying five randomly selected classes in FashionMNIST dataset, and task 2 is classifying  
 211 the remaining five classes). It shows that prospective configuration outperforms backpropagation in both  
 212 terms of avoiding forgetting previous tasks and re-learning current tasks. Fig. 4h summarizes the results  
 213 and repeat the experiment on CIFAR-10.

214 Another key challenge for biological systems is to decide which actions to take. Reinforcement  
 215 learning theories (e.g., *Q*-learning) propose that it is solved by learning the expected reward resulting from  
 216 different actions in different situations<sup>74</sup>. Such prediction of rewards can be made by neural networks<sup>21</sup>,  
 217 which can be trained with prospective configuration or backpropagation. The sum of rewards per episode  
 218 during training on three classic reinforcement learning tasks is reported in Fig. 4i, where prospective



219 configuration demonstrates a notable advance over backpropagation. This large advantage may arise  
220 because reinforcement learning is particularly sensitive to erratic changes in network's weights (as the  
221 target output depends on reward predicted by the network itself for a new state - see Methods).

222 Based on the superior learning performance of prospective configuration, we may expect that this  
223 learning mechanism has been favored by evolution, thus in the next sections we investigate if it can account  
224 for neural activity and behaviour during learning better than backpropagation.

### 225 **Evidence for prospective configuration: inferring of latent state during learning**

226 Prospective configuration is related to theories proposing that before learning, the brain first infers a  
227 latent state of environment from feedback<sup>75-77</sup>. Here, we propose that this inference can be achieved in  
228 neural circuits through prospective configuration, where following feedback, neurons in “hidden layers”  
229 converge to a prospective pattern of activity that encodes this latent state. We demonstrate that data from  
230 various previous studies, which involved the inference of a latent state, can be explained by prospective  
231 configuration. These data were previously explained by complex and abstract mechanisms, such as  
232 Bayesian models<sup>75,76</sup>, while here we mechanistically show with prospective configuration how such  
233 inference can be performed by minimal networks encoding only the essential elements of the tasks.

234 The dynamical inference of latent state from feedback has been recently proposed to take place during  
235 sensorimotor learning<sup>76</sup>. In this experiment, participants received different motor perturbations in different  
236 contexts, and learned to compensate for these perturbations. Behavioural data suggest that after receiving  
237 the feedback, the participants were first employing it to infer the context, and then adapted the force for  
238 the inferred context. We demonstrate that prospective configuration is able to reproduce these behavioural  
239 data, while backpropagation cannot.

240 Specifically, in the task (Fig. 5a), participants were asked to move a stick from a starting point to  
241 a target point, while experiencing perturbations. The participants experienced a sequence of blocks  
242 of trials (Fig. 5c-e) including training, washout, and testing. During the training session, different  
243 directions of perturbations, positive (+) or negative (-), were applied in different contexts, blue (B) or  
244 red (R) backgrounds, respectively. We denote these trials as B+ and R-. During the washout session, no  
245 perturbation was provided. In the testing session, the participants experienced one of the four possible test  
246 trials: B+, R+, B-, and R-. To evaluate learning on the test trials, motor adaptation (i.e., the difference  
247 between the final and target stick positions) was measured before and after the test trial, on two trials  
248 with blue background. The change of the adaptation between these two trials is a reflection of learning  
249 about blue context that occurred at the test trial. If participants just associated feedback with the colour  
250 of background (B), then the change of adaptation would only occur with test trials B+ and B-. However,  
251 experimental data (Fig. 5f, right) show that there was substantial adaptation change also with R+ trials  
252 (which was even bigger than with B- trials).

253 To model learning in this task, we consider a neural network (Fig. 5b) where input nodes encode the  
254 colour of background, and outputs encode movement compensations in the two directions. Importantly,  
255 this network also includes hidden neurons encoding belief of being in the contexts associated with the  
256 two backgrounds ([B] and [R]). Trained with the exact procedure of the experiment<sup>76</sup> from randomly  
257 initialized weights, prospective configuration with this minimal network can reproduce the behavioural  
258 data, while backpropagation cannot (cf., Fig. 5f left and middle).

259 Prospective configuration can produce change in adaptation with R+ test trial, because after + feedback,  
260 it is able to also activate context [B] that was associated with this feedback during training, and then  
261 learn compensation for this latent state. To shed light on how this inference takes place in the model, the  
262 bottom parts of Fig. 5c-d show evolution of the weights of the network over sessions (thickness represents  
263 the strength of connections). Fig. 5e bottom, shows the difference between the two learning rules at the



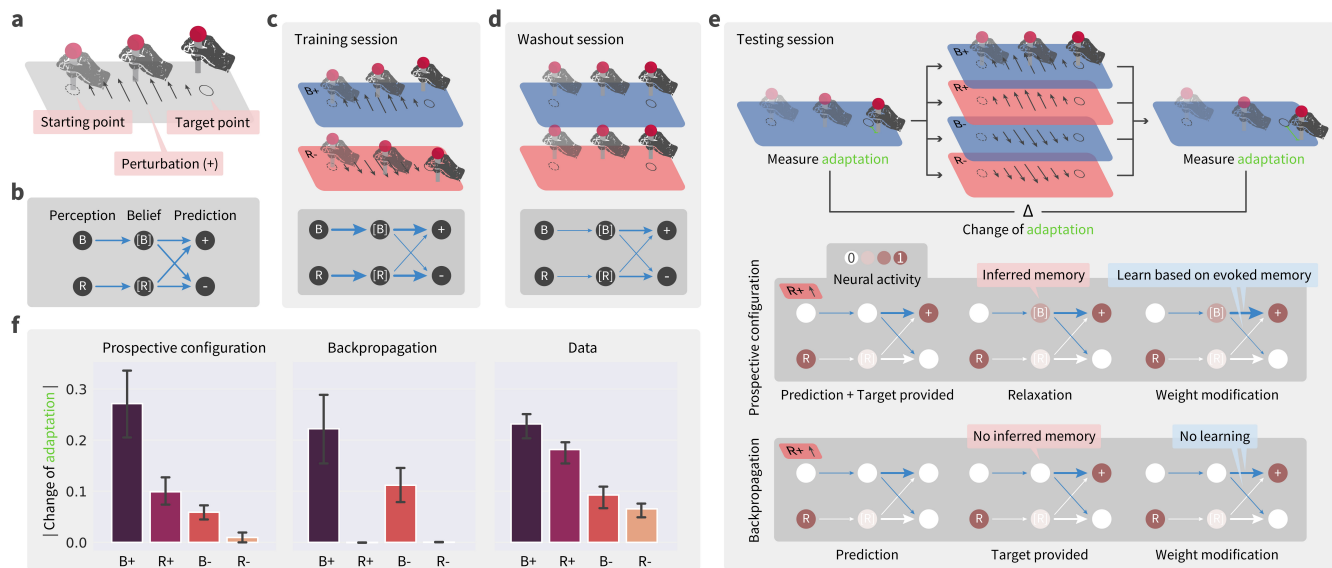

**Fig. 5 | Prospective configuration explains contextual inference in human sensorimotor learning.** ▶ **a** | The structure of an experimental trial, where participants were asked to move a stick from the starting point to the target point while experiencing perturbations. ▶ **b** | The minimal network for this task, including six connections encoding the associations from the backgrounds (B and R) to the belief of contexts ([B] and [R]), as well as from belief of contexts to prediction of perturbations (+ and -). ▶ **c-e** | A sequence of sessions the participants experienced: training, washout, and testing. Inside each panel, the darker box demonstrates the expected network after the session, where thickness represents the strength of connections. In the testing session, the darker box explains how the two learning rules learn differently on the R+ trial, leading to the differences in panel f. ▶ **f** | Predictions of the two learning rules compared against behavioural data measured from human participants, where prospective configuration reproduces the key patterns of data but backpropagation cannot.

264 exposure to R+: although B is not perceived, prospective configuration infers a moderate excitation of  
 265 the belief of blue context [B], because the positive connection from [B] to + was built during the  
 266 training session. The activation of [B] enables the learning of weights from [B] to + and -; while backpropagation  
 267 does not modify any weights originating from [B].

268 Studies of animal conditioning have also observed that feedback in learning tasks involving multiple  
 269 stimuli may trigger learning about non-presented stimuli<sup>78-82</sup>. For example, in one study<sup>78</sup> rats were  
 270 trained to associate fear (electric shock) with noise and light; and then, in one group, fear related to  
 271 light was eliminated in an extinction session (Fig. 6a). Remarkably, the data suggested that eliminating  
 272 the fear to light increased the fear to noise (Fig. 6b). Such learning is not predicted by the standard  
 273 Rescorla-Wagner model<sup>83</sup>. We consider a neural network (Fig. 6c) that includes two input neurons  
 274 encoding the two stimuli, two hidden neurons, and one output neuron encoding the fear. Trained with  
 275 the exact procedure of animal experiment<sup>78</sup> from randomly initialized weights, prospective configuration  
 276 with this simple network can reproduce the data, while backpropagation cannot (cf., Fig. 6b blue and  
 277 orange). In the network employing prospective configuration, the feedback changes the activity of a  
 278 hidden neuron previously associated with this feedback and with non-presented stimulus (noise), and  
 279 hence enables modification of connections of this neuron (a learning mechanism analogous to that in  
 280 sensorimotor learning Fig. 5, see Extended Data Fig. 5 for details).

### 281 Evidence for prospective configuration: discovering task structure during learning

282 Prospective configuration is also able to discover the underlying task structure in reinforcement learning.  
 283 Particularly, we consider a task where reward probabilities of different options were not independent<sup>75</sup>.

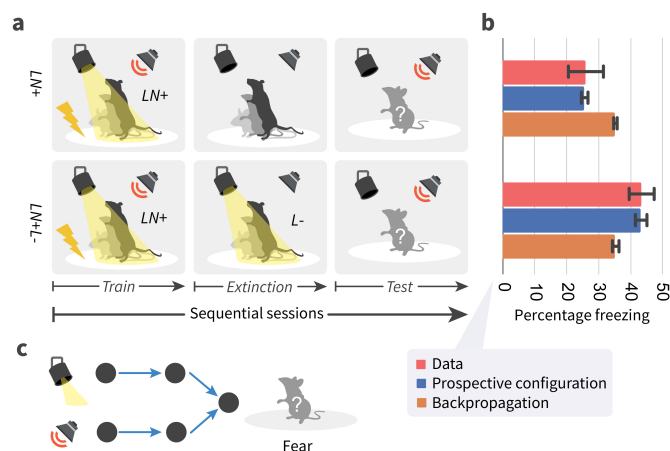

**Fig. 6 | Prospective configuration infers latent state during fear conditioning.** ▶ **a** | The fear conditioning task, where rats are first trained to associate fear (electric shock) with noise and light; then in one of the groups, fear related to light is eliminated in extinction session; finally, the predicted fear (percentage of rats freezing) of noise is measured in test session. ▶ **b** | The predicted fear from networks trained with prospective configuration and backpropagation, compared against the fear (percentage freezing) measured in rats. Prospective configuration reproduces the key finding that eliminating the fear to light changes the fear to noise. ▶ **c** | The architecture of simulated networks.

284 In this study humans were choosing between two options, whose reward probabilities were constrained  
 285 such that one option had higher reward probability than the other (Fig. 7a). Occasionally the reward  
 286 probabilities were swapped, so if one probability was increased, the other was decreased by the same  
 287 amount. Remarkably, the recorded fMRI data suggested that participants learned that the values of two  
 288 options were negatively correlated, and on each trial updated the value estimates of both options in opposite  
 289 ways. This conclusion was drawn from the analysis of the signal from medial prefrontal cortex which  
 290 encoded the expected value of reward. Fig. 7c, right compares this signal after making a choice on two  
 291 consecutive trials: a trial on which reward was not received (“Punish trial”) and the next trial. If the  
 292 participant selected the same option on both trials (“Stay”), the signal decreased, indicating the reward  
 293 expected by the participant was reduced. Remarkably, if the participant selected the other option on the  
 294 next trial (“Switch”), the signal increased, suggesting that negative feedback for one option increased the  
 295 value estimate for the other. Such learning is not predicted by standard reinforcement learning models<sup>75</sup>.

296 This task can be conceptualized as having a latent state encoding which option is superior, and this  
 297 latent state determines the reward probabilities for both options. Consequently, we consider a neural  
 298 network reflecting this structure (Fig. 7b) that includes an input neuron encoding being in this task (equal  
 299 to 1 in simulations), a hidden neuron encoding the latent state, and two output neurons encoding the reward  
 300 probabilities for the two options. Trained with the exact procedure of the experiment<sup>75</sup> from randomly  
 301 initialized weights, prospective configuration with this minimal network can reproduce the data, while  
 302 backpropagation cannot (cf., Fig. 7c left and middle).

303 To shed light on the difference between the models, we simulate an “idealized” version of the task  
 304 in Fig. 7d-e: the network shown in the inset starts from ( $\{W_0 = 1, W_1 = 1, W_2 = -1\}$ ) and is trained for  
 305 64 trials in total. The rewards and punishments are delivered deterministically, and the reversal only  
 306 occurs once at the beginning of training. Fig. 7d inspects prospective configuration at the first few training  
 307 iterations: during relaxation, the hidden neuron is able to infer its prospective configuration, i.e., negative  
 308 hidden activity encoding that the rewarded choice has reversed. In Fig. 7e, such inference by prospective  
 309 configuration results in an increase of  $W_1$ : since it has inferred from the punishment that the rewarded  
 310 choice has reversed to a non-rewarded one, such punishment strengthens the connection from the latent

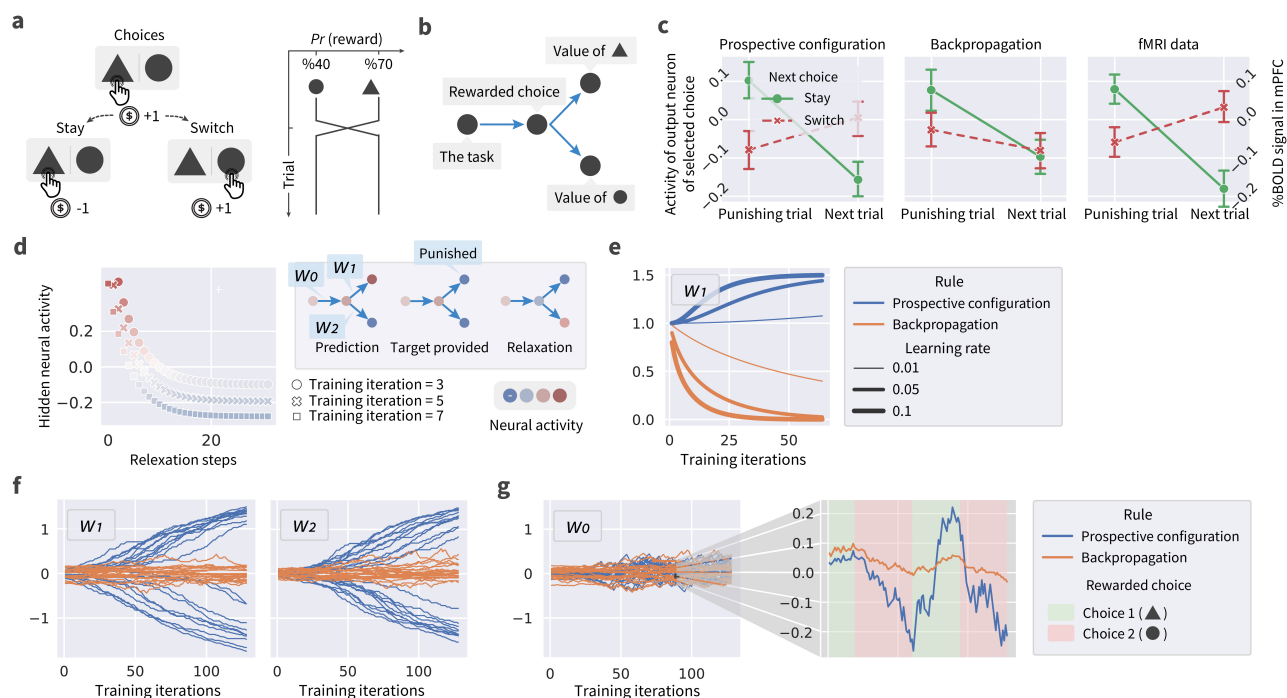

**Fig. 7 | Prospective configuration can discover the underlying task structure during reinforcement learning.**

► **a** | The reinforcement learning task, where human participants need to choose between two options, leading to either reward (gaining coins) or punishment (losing coins) with different probabilities. The probability of reward is occasionally reversed between the two options. ► **b** | The minimal network encoding the essential elements of the task. ► **c** | The activity of output neuron corresponding to the selected option, from networks trained with prospective configuration and backpropagation, compared against the fMRI data measured in human participants, i.e., peak blood oxygenation level-dependent (%BOLD) signal in the medial prefrontal cortex (mPFC). Prospective configuration reproduces the key finding that the expected value (encoded in %BOLD signal in mPFC) increases if the next choice after a punishing trial is to switch to the other option. ► **d** | Prospective configuration at the first few training iterations in an “idealized” version of the task: during relaxation, the hidden neuron is able to infer its prospective configuration, i.e., negative hidden activity encoding that the rewarded choice has reversed. ► **e** | Such inference by prospective configuration results in an increase of  $W_1$ . By contrast, in backpropagation  $W_1$  is decreased. Similar behavior also applies to  $W_2$ . ► **f** | The  $W_1$  and  $W_2$  in the simulation of the full task with stochastic rewards. Different lines correspond to different simulations. ► **g** | The evolution of  $W_0$  in the full task. In prospective configuration, this weight remains closer to 0 than  $W_1$  and  $W_2$ . Inset shows  $W_0$  on one of the simulation in the main plot, where it is demonstrated that prospective configuration easily flips  $W_0$  as the rewarded choice changes, while backpropagation has difficulty in accomplishing this.

311 state representing non-rewarded choice to a punishment. By contrast, in backpropagation  $W_1$  is decreased:  
 312 since it receives a punishment without updating the latent state (still encoding that the rewarded choice has  
 313 not changed), it weakens the connection from the latent state to a reward. Fig. 7f shows the  $W_1$  and  $W_2$   
 314 in the simulation of the full task with stochastic rewards. The weights follow a similar pattern as in the  
 315 simplified task, i.e., their magnitude increases in prospective configuration. This signifies that the network  
 316 learns that the rewards from the two options are jointly determined by a hidden state. This increase of the  
 317 magnitude of  $W_1$  and  $W_2$  enables the network to infer the hidden state from the feedback, and learn the  
 318 task structure (as described for panel b). Fig. 7g shows the evolution of  $W_0$  in the full task. In prospective  
 319 configuration, this weight remains closer to 0 than  $W_1$  and  $W_2$ . Inset shows  $W_0$  on one of the simulation  
 320 in the main plot, where it is demonstrated that prospective configuration easily flips  $W_0$  as the rewarded  
 321 choice changes, while backpropagation has difficulty in accomplishing this. The reason of such behavior

322 is as follows: thanks to large magnitude of  $W_1$  and  $W_2$  in prospective configuration, an error on the output  
323 unit results in a large error on the hidden unit, so the network is able to quickly flip the sign of  $W_0$  whenever  
324 the observation mismatches the expectation. This results in an increased expectation on the Switch trials  
325 (panel c).

326 Taken together, presented three simulations illustrate that prospective configuration is a common  
327 principle that can explain a range of surprising learning effects in diverse tasks.

## 328 Discussion

329 Our paper identifies the principle of prospective configuration, according to which learning relies on  
330 neurons first optimizing their pattern of activity to match the correct output, and then reinforcing these  
331 prospective activities through synaptic plasticity. Although it was known that in energy-based networks the  
332 activity of neurons shifts before weight update, it has been previously thought that this shift is a necessary  
333 cost of error propagation in biological networks, and several methods have been proposed to suppress  
334 it<sup>29,30,37,50,51</sup> to approximate backpropagation more closely. By contrast, we demonstrate that this  
335 reconfiguration of neural activity is the key to achieving learning performance superior to backpropagation,  
336 and to explaining experimental data from diverse learning tasks. Prospective configuration further offers a  
337 range of experimental predictions distinct from those of backpropagation (Extended Data Figs. 6–7). In  
338 sum, we have demonstrated that our novel credit assignment principle of prospective configuration enables  
339 more efficient learning than backpropagation by reducing interference, superior performance in situations  
340 faced by biological organisms, requires only local computation and plasticity, and can match experimental  
341 data across a wide range of tasks.

342 Our theory addresses a long-standing question of how the brain solves the plasticity-stability dilemma,  
343 e.g. how it is possible that despite learning and adjustment of representation in primary visual cortex<sup>84</sup>,  
344 we can still perceive the world and understand the meaning of visual stimuli we learned over our lifetime.  
345 According to prospective configuration, when some weights are modified during learning, compensatory  
346 changes are made to other weights, to ensure the stability of previously acquired knowledge. Previous  
347 computational models have also proposed mechanisms reducing interference between different pieces of  
348 learned information<sup>73,85</sup>, and it is highly likely that these mechanisms operate in the brain in addition to  
349 prospective configuration and jointly reduce the interference most effectively.

350 The advantages of prospective configuration suggest that it may be profitably applied in machine  
351 learning to improve the efficiency and performance of deep neural networks. An obstacle for this is that  
352 the relaxation phase is computationally expensive. However, it has been demonstrated that the speed of  
353 energy-based networks can be greatly increased by implementing the relaxation on analog hardware<sup>86,87</sup>,  
354 potentially resulting in energy-based network being faster than backpropagation. Therefore, we anticipate  
355 that our discoveries may change the blueprint of next-generation machine learning hardware — switching  
356 from the current digital tensor base to analog hardware, being closer to the brain and potentially far more  
357 efficient.

## 358 References

- 359 1. Lillicrap, T. P., Santoro, A., Marris, L., Akerman, C. J. & Hinton, G. Backpropagation and the brain. *Nat. Rev.*  
360 *Neurosci.* **21**, 335–346 (2020).
- 361 2. Richards, B. A. *et al.* A deep learning framework for neuroscience. *Nat. Neurosci.* **22**, 1761–1770 (2019).
- 362 3. Whittington, J. C. & Bogacz, R. Theories of error back-propagation in the brain. *Trends Cogn. Sci.* (2019).

- 363 4. Zipser, D. & Andersen, R. A. A back-propagation programmed network that simulates response properties of  
364 a subset of posterior parietal neurons. *Nature* **331**, 679–684 (1988).
- 365 5. Singer, Y. *et al.* Sensory cortex is optimized for prediction of future input. *Elife* **7**, e31557 (2018).
- 366 6. Cadieu, C. F. *et al.* Deep neural networks rival the representation of primate it cortex for core visual object  
367 recognition. *PLoS Comput. Biol.* **10**, e1003963 (2014).
- 368 7. Yamins, D. L. *et al.* Performance-optimized hierarchical models predict neural responses in higher visual  
369 cortex. *Proc. Natl. Acad. Sci.* **111**, 8619–8624 (2014).
- 370 8. Khaligh-Razavi, S.-M. & Kriegeskorte, N. Deep supervised, but not unsupervised, models may explain it  
371 cortical representation. *PLoS Comput. Biol.* **10** (2014).
- 372 9. Yamins, D. L. & DiCarlo, J. J. Using goal-driven deep learning models to understand sensory cortex. *Nat.*  
373 *Neurosci.* **19**, 356 (2016).
- 374 10. Keller, G. B. & Mrsic-Flogel, T. D. Predictive processing: A canonical cortical computation. *Neuron* **100**,  
375 424–435 (2018).
- 376 11. Whittington, J. C. *et al.* The tolmán-eichenbaum machine: Unifying space and relational memory through  
377 generalization in the hippocampal formation. *Cell* **183**, 1249–1263 (2020).
- 378 12. Banino, A. *et al.* Vector-based navigation using grid-like representations in artificial agents. *Nature* **557**,  
379 429–433 (2018).
- 380 13. Werbos, P. Beyond regression: new tools for prediction and analysis in the behavioral sciences. *Ph. D.*  
381 *dissertation, Harv. Univ.* (1974).
- 382 14. Rumelhart, D. E., Hinton, G. E. & Williams, R. J. Learning internal representations by error propagation.  
383 Tech. Rep., California Univ San Diego La Jolla Inst for Cognitive Science (1985).
- 384 15. Parker, D. B. Learning-logic: Casting the cortex of the human brain in silicon. *Tech. report TR-47* (1985).
- 385 16. LeCun, Y., Bengio, Y. & Hinton, G. Deep learning. *Nature* **521**, 436–444 (2015).
- 386 17. Krizhevsky, A., Sutskever, I. & Hinton, G. E. ImageNet classification with deep convolutional neural networks.  
387 In *Advances in Neural Information Processing Systems (NeurIPS)*, vol. 25, 1097–1105 (2012).
- 388 18. He, H., Boyd-Graber, J., Kwok, K. & Daum III, H. Opponent modeling in deep reinforcement learning. In  
389 *Proceedings of the International Conference on Machine Learning (ICML)* (2016).
- 390 19. Hannun, A. *et al.* Deep speech: Scaling up end-to-end speech recognition. *arXiv preprint arXiv:1412.5567*  
391 (2014).
- 392 20. Vaswani, A. *et al.* Attention is all you need. In *Advances in Neural Information Processing Systems (NeurIPS)*,  
393 5998–6008 (2017).
- 394 21. Mnih, V. *et al.* Human-level control through deep reinforcement learning. *Nature* (2015).
- 395 22. Silver, D. *et al.* Mastering the game of go with deep neural networks and tree search. *Nature* **529**, 484–489  
396 (2016).
- 397 23. Crick, F. The recent excitement about neural networks. *Nature* **337**, 129–132 (1989).
- 398 24. Grossberg, S. Competitive learning: From interactive activation to adaptive resonance. *Cogn. Sci.* **11**, 23–63  
399 (1987).
- 400 25. Tsividis, P. A., Pouncy, T., Xu, J. L., Tenenbaum, J. B. & Gershman, S. J. Human learning in atari. In *2017*  
401 *AAAI Spring Symposium Series* (2017).
- 402 26. Kell, A. J., Yamins, D. L., Shook, E. N., Norman-Haignere, S. V. & McDermott, J. H. A task-optimized  
403 neural network replicates human auditory behavior, predicts brain responses, and reveals a cortical processing  
404 hierarchy. *Neuron* **98**, 630–644 (2018).



- 405 **27.** Sacramento, J., Costa, R. P., Bengio, Y. & Senn, W. Dendritic cortical microcircuits approximate the  
406 backpropagation algorithm. In *Advances in Neural Information Processing Systems (NeurIPS)*, 8721–8732  
407 (2018).
- 408 **28.** Guerguiev, J., Lillicrap, T. P. & Richards, B. A. Towards deep learning with segregated dendrites. *Elife* **6**,  
409 e22901 (2017).
- 410 **29.** Scellier, B. & Bengio, Y. Equilibrium propagation: Bridging the gap between energy-based models and  
411 backpropagation. *Front. Comput. Neurosci.* **11**, 24 (2017).
- 412 **30.** Whittington, J. C. & Bogacz, R. An approximation of the error backpropagation algorithm in a predictive  
413 coding network with local hebbian synaptic plasticity. *Neural Comput.* **29**, 1229–1262 (2017).
- 414 **31.** Lillicrap, T. P., Cownden, D., Tweed, D. B. & Akerman, C. J. Random synaptic feedback weights support  
415 error backpropagation for deep learning. *Nat. Commun.* **7**, 1–10 (2016).
- 416 **32.** Roelfsema, P. R. & Ooyen, A. v. Attention-gated reinforcement learning of internal representations for  
417 classification. *Neural Comput.* **17**, 2176–2214 (2005).
- 418 **33.** Pozzi, I., Bohté, S. & Roelfsema, P. A biologically plausible learning rule for deep learning in the brain. *arXiv*  
419 *preprint arXiv:1811.01768* (2018).
- 420 **34.** Körding, K. P. & König, P. Supervised and unsupervised learning with two sites of synaptic integration. *J.*  
421 *Comput. Neurosci.* **11**, 207–215 (2001).
- 422 **35.** Richards, B. A. & Lillicrap, T. P. Dendritic solutions to the credit assignment problem. *Curr. Opin. Neurobiol.*  
423 **54**, 28–36 (2019).
- 424 **36.** Payeur, A., Guerguiev, J., Zenke, F., Richards, B. A. & Naud, R. Burst-dependent synaptic plasticity can  
425 coordinate learning in hierarchical circuits. *Nat. Neurosci.* 1–10 (2021).
- 426 **37.** Song, Y., Lukasiewicz, T., Xu, Z. & Bogacz, R. Can the brain do backpropagation?—Exact implementation  
427 of backpropagation in predictive coding networks. In *Advances in Neural Information Processing Systems*  
428 *(NeurIPS)*, vol. 33, 22566 (Europe PMC Funders, 2020).
- 429 **38.** Salvatori, T., Song, Y., Lukasiewicz, T., Bogacz, R. & Xu, Z. Reverse differentiation via predictive coding. In  
430 *Proceedings of the AAAI Conference on Artificial Intelligence* (2022).
- 431 **39.** McCloskey, M. & Cohen, N. J. Catastrophic interference in connectionist networks: The sequential learning  
432 problem. In *Psychology of Learning and Motivation*, vol. 24, 109–165 (Elsevier, 1989).
- 433 **40.** McNaughton, B. L. & O’Reilly, R. C. Why there are complementary learning systems in the hippocampus and  
434 neocortex: Insights from the successes and failures of. *Psychol. Rev.* **102**, 419–457 (1995).
- 435 **41.** Hopfield, J. J. Neural networks and physical systems with emergent collective computational abilities. *Proc.*  
436 *Natl. Acad. Sci.* **79**, 2554–2558 (1982).
- 437 **42.** Friston, K. A theory of cortical responses. *Philos. Transactions Royal Soc. B: Biol. sciences* **360**, 815–836  
438 (2005).
- 439 **43.** Rao, R. P. & Ballard, D. H. Predictive coding in the visual cortex: A functional interpretation of some  
440 extra-classical receptive-field effects. *Nat. Neurosci.* **2**, 79–87 (1999).
- 441 **44.** Friston, K. The free-energy principle: A unified brain theory? *Nat. Rev. Neurosci.* **11**, 127–138 (2010).
- 442 **45.** Hohwy, J., Roepstorff, A. & Friston, K. Predictive coding explains binocular rivalry: An epistemological  
443 review. *Cognition* **108**, 687–701 (2008).
- 444 **46.** Auztulewicz, R. & Friston, K. Repetition suppression and its contextual determinants in predictive coding.  
445 *Cortex* **80**, 125–140 (2016).

- 446 **47.** Watanabe, E., Kitaoka, A., Sakamoto, K., Yasugi, M. & Tanaka, K. Illusory motion reproduced by deep neural  
447 networks trained for prediction. *Front. psychology* **9**, 345 (2018).
- 448 **48.** Feldman, H. & Friston, K. Attention, uncertainty, and free-energy. *Front. human neuroscience* **4**, 215 (2010).
- 449 **49.** Kanai, R., Komura, Y., Shipp, S. & Friston, K. Cerebral hierarchies: predictive processing, precision and the  
450 pulvinar. *Philos. Transactions Royal Soc. B: Biol. Sci.* **370**, 20140169 (2015).
- 451 **50.** Bengio, Y. & Fischer, A. Early inference in energy-based models approximates back-propagation. *arXiv*  
452 *preprint arXiv:1510.02777* (2015).
- 453 **51.** Millidge, B., Tschantz, A. & Buckley, C. L. Predictive coding approximates backprop along arbitrary  
454 computation graphs. *arXiv preprint arXiv:2006.04182* (2020).
- 455 **52.** O'reilly, R. C. & Munakata, Y. *Computational explorations in cognitive neuroscience: Understanding the*  
456 *mind by simulating the brain* (MIT Press Cambridge, 2000).
- 457 **53.** Quilodran, R., Rothe, M. & Procyk, E. Behavioral shifts and action valuation in the anterior cingulate cortex.  
458 *Neuron* **57**, 314–325 (2008).
- 459 **54.** Wallis, J. D. & Kennerley, S. W. Heterogeneous reward signals in prefrontal cortex. *Curr. opinion neurobiology*  
460 **20**, 191–198 (2010).
- 461 **55.** Buckley, C. L., Kim, C. S., McGregor, S. & Seth, A. K. The free energy principle for action and perception: A  
462 mathematical review. *J. Math. Psychol.* **81**, 55–79 (2017).
- 463 **56.** Hinton, G. E. Training products of experts by minimizing contrastive divergence. *Neural computation* **14**,  
464 1771–1800 (2002).
- 465 **57.** LeCun, Y., Chopra, S., Hadsell, R., Ranzato, M. & Huang, F. A tutorial on energy-based learning. *Predict.*  
466 *structured data* **1** (2006).
- 467 **58.** Hinton, G. E. A practical guide to training restricted boltzmann machines. In *Neural networks: Tricks of the*  
468 *trade*, 599–619 (Springer, 2012).
- 469 **59.** Felleman, D. J. & Van Essen, D. C. Distributed hierarchical processing in the primate cerebral cortex. *Cereb.*  
470 *Cortex* **1**, 1–47 (1991).
- 471 **60.** Lee, D.-H., Zhang, S., Fischer, A. & Bengio, Y. Difference target propagation. In *Joint European Conference*  
472 *on Machine Learning and Knowledge Discovery in Databases*, 498–515 (Springer, 2015).
- 473 **61.** Fontenla-Romero, Ó., Guijarro-Berdiñas, B., Martínez-Rego, D., Pérez-Sánchez, B. & Peteiro-Barral, D.  
474 Online machine learning. In *Efficiency and Scalability Methods for Computational Intellect*, 27–54 (IGI  
475 Global, 2013).
- 476 **62.** Gama, J., Žliobaitė, I., Bifet, A., Pechenizkiy, M. & Bouchachia, A. A survey on concept drift adaptation.  
477 *ACM Comput. Surv. (CSUR)* **46**, 1–37 (2014).
- 478 **63.** Hinton, G. E. *et al.* Learning distributed representations of concepts. In *Proceedings of the eighth annual*  
479 *conference of the cognitive science society*, vol. 1, 12 (Amherst, MA, 1986).
- 480 **64.** Hassabis, D., Kumaran, D., Summerfield, C. & Botvinick, M. Neuroscience-inspired artificial intelligence.  
481 *Neuron* **95**, 245–258 (2017).
- 482 **65.** Xiao, H., Rasul, K. & Vollgraf, R. Fashion MNIST: A novel image dataset for benchmarking machine learning  
483 algorithms. *arXiv preprint arXiv:1708.07747* (2017).
- 484 **66.** Krizhevsky, A. & Hinton, G. Learning multiple layers of features from tiny images. *Report* (2009).
- 485 **67.** Jia, X. *et al.* Highly scalable deep learning training system with mixed-precision: Training imagenet in four  
486 minutes. *arXiv preprint arXiv:1807.11205* (2018).

- 487 **68.** Puri, R., Kirby, R., Yakovenko, N. & Catanzaro, B. Large scale language modeling: Converging on 40gb of  
488 text in four hours. In *2018 30th International Symposium on Computer Architecture and High Performance*  
489 *Computing (SBAC-PAD)*, 290–297 (IEEE, 2018).
- 490 **69.** Berner, C. *et al.* Dota 2 with large scale deep reinforcement learning. *arXiv preprint arXiv:1912.06680* (2019).
- 491 **70.** Ioffe, S. & Szegedy, C. Batch normalization: Accelerating deep network training by reducing internal covariate  
492 shift. In *Proceedings of the International Conference on Machine Learning (ICML)* (2015).
- 493 **71.** Ratcliff, R. Connectionist models of recognition memory: Constraints imposed by learning and forgetting  
494 functions. *Psychol. review* **97**, 285 (1990).
- 495 **72.** French, R. M. Catastrophic forgetting in connectionist networks. *Trends cognitive sciences* **3**, 128–135 (1999).
- 496 **73.** Zenke, F., Poole, B. & Ganguli, S. Continual learning through synaptic intelligence. In *International*  
497 *Conference on Machine Learning*, 3987–3995 (PMLR, 2017).
- 498 **74.** Sutton, R. S. & Barto, A. G. *Introduction to Reinforcement Learning*, vol. 2 (MIT Press Cambridge, 1998).
- 499 **75.** Hampton, A. N., Bossaerts, P. & O’doherly, J. P. The role of the ventromedial prefrontal cortex in abstract  
500 state-based inference during decision making in humans. *J. Neurosci.* **26**, 8360–8367 (2006).
- 501 **76.** Heald, J. B., Lengyel, M. & Wolpert, D. M. Contextual inference underlies the learning of sensorimotor  
502 repertoires. *Nature* **600**, 489–493 (2021).
- 503 **77.** Larsen, T., Leslie, D. S., Collins, E. J. & Bogacz, R. Posterior weighted reinforcement learning with state  
504 uncertainty. *Neural computation* **22**, 1149–1179 (2010).
- 505 **78.** Kaufman, M. A. & Bolles, R. C. A nonassociative aspect of overshadowing. *Bull. Psychon. Soc.* **18**, 318–320  
506 (1981).
- 507 **79.** Matzel, L. D., Schachtman, T. R. & Miller, R. R. Recovery of an overshadowed association achieved by  
508 extinction of the overshadowing stimulus. *Learn. Motiv.* **16**, 398–412 (1985).
- 509 **80.** Matzel, L. D., Shuster, K. & Miller, R. R. Covariation in conditioned response strength between stimuli trained  
510 in compound. *Animal Learn. & Behav.* **15**, 439–447 (1987).
- 511 **81.** Hallam, S. C., Matzel, L. D., Sloat, J. S. & Miller, R. R. Excitation and inhibition as a function of posttraining  
512 extinction of the excitatory cue used in pavlovian inhibition training. *Learn. Motiv.* **21**, 59–84 (1990).
- 513 **82.** Miller, R. R., Esposito, J. J. & Grahame, N. J. Overshadowing-like effects between potential comparator  
514 stimuli: Covariation in comparator roles of context and punctate excitor used in inhibitory training as a function  
515 of excitor salience. *Learn. Motiv.* **23**, 1–26 (1992).
- 516 **83.** Rescorla, R. A. A theory of pavlovian conditioning: Variations in the effectiveness of reinforcement and  
517 nonreinforcement. *Curr. research theory* 64–99 (1972).
- 518 **84.** Poort, J. *et al.* Learning enhances sensory and multiple non-sensory representations in primary visual cortex.  
519 *Neuron* **86**, 1478–1490 (2015).
- 520 **85.** McClelland, J. L., McNaughton, B. L. & O’Reilly, R. C. Why there are complementary learning systems in  
521 the hippocampus and neocortex: insights from the successes and failures of connectionist models of learning  
522 and memory. *Psychol. review* **102**, 419 (1995).
- 523 **86.** Foroushani, A. N., Assaf, H., Noshahr, F. H., Savaria, Y. & Sawan, M. Analog circuits to accelerate the  
524 relaxation process in the equilibrium propagation algorithm. In *2020 IEEE International Symposium on*  
525 *Circuits and Systems (ISCAS)*, 1–5 (IEEE, 2020).
- 526 **87.** Hertz, J., Krogh, A., Lautrup, B. & Lehmann, T. Nonlinear backpropagation: Doing backpropagation without  
527 derivatives of the activation function. *IEEE Transactions on Neural Networks* **8**, 1321–1327 (1997).
- 528 **88.** Goodfellow, I., Bengio, Y. & Courville, A. *Deep learning* (MIT Press Cambridge, 2016).

- 529 **89.** O'Reilly, R. C. Biologically plausible error-driven learning using local activation differences: The generalized  
530 recirculation algorithm. *Neural Comput.* **8**, 895–938 (1996).
- 531 **90.** Almeida, L. B. A learning rule for asynchronous perceptrons with feedback in a combinatorial environment.  
532 In *Artificial Neural Networks: Concept Learning*, 102–111 (IEEE Computer Society Press, 1990).
- 533 **91.** Pineda, F. Generalization of back propagation to recurrent and higher order neural networks. In *Advances in*  
534 *Neural Information Processing Systems (NeurIPS)*, 602–611 (1987).
- 535 **92.** Pineda, F. J. Dynamics and architecture for neural computation. *J. Complex.* **4**, 216–245 (1988).
- 536 **93.** Hebb, D. O. *The organisation of behaviour: A neuropsychological theory* (Science Editions New York, 1949).
- 537 **94.** Glorot, X. & Bengio, Y. Understanding the difficulty of training deep feedforward neural networks. In  
538 *Proceedings of the Thirteenth International Conference on Artificial Intelligence and Statistics*, 249–256  
539 (JMLR Workshop and Conference Proceedings, 2010).
- 540 **95.** Krizhevsky, A., Nair, V. & Hinton, G. CIFAR-10. In *Canadian Institute for Advanced Research*, vol. 5, 4  
541 (2010).
- 542 **96.** Žliobaitė, I. Learning under concept drift: An overview. *arXiv preprint arXiv:1010.4784* (2010).
- 543 **97.** Tsymbal, A. The problem of concept drift: Definitions and related work. *Comput. Sci. Dep. Trinity Coll.*  
544 *Dublin* **106**, 58 (2004).
- 545 **98.** Sutton, R. S. Generalization in reinforcement learning: Successful examples using sparse coarse coding. In  
546 *Advances in Neural Information Processing Systems (NeurIPS)*, vol. 8 (1995).
- 547 **99.** Geramifard, A., Dann, C., Klein, R. H., Dabney, W. & How, J. P. RLPy: A value-function-based reinforcement  
548 learning framework for education and research. *J. Mach. Learn. Res.* **16**, 1573–1578 (2015).
- 549 **100.** Moore, A. Efficient memory-based learning for robot control. Tech. Rep., Carnegie Mellon University,  
550 Pittsburgh, PA (1990).
- 551 **101.** Barto, A. G., Sutton, R. S. & Anderson, C. W. Neuronlike adaptive elements that can solve difficult learning  
552 control problems. *IEEE Transactions on Syst. Man, Cybern.* 834–846 (1983).
- 553 **102.** Brockman, G. *et al.* Openai gym. *arXiv:1606.01540* (2016).
- 554 **103.** Welford, B. Note on a method for calculating corrected sums of squares and products. *Technometrics* **4**,  
555 419–420 (1962).
- 556 **104.** Knuth, D. E. *Art of computer programming, volume 2: Seminumerical algorithms* (Addison-Wesley Profes-  
557 sional, 2014).
- 558 **105.** Meulemans, A., Carzaniga, F. S., Suykens, J. A., Sacramento, J. & Grewe, B. F. A theoretical framework for  
559 target propagation. *arXiv preprint arXiv:2006.14331* (2020).
- 560 **106.** Bengio, Y. Deriving differential target propagation from iterating approximate inverses. *arXiv preprint*  
561 *arXiv:2007.15139* (2020).
- 562 **107.** Bastos, A. M. *et al.* Canonical microcircuits for predictive coding. *Neuron* **76**, 695–711 (2012).
- 563 **108.** Attinger, A., Wang, B. & Keller, G. B. Visuomotor coupling shapes the functional development of mouse  
564 visual cortex. *Cell* **169**, 1291–1302 (2017).
- 565 **109.** Boerlin, M., Machens, C. K. & Denève, S. Predictive coding of dynamical variables in balanced spiking  
566 networks. *PLoS Comput. Biol.* **9**, e1003258 (2013).
- 567 **110.** Brendel, W., Bourdoukan, R., Verterchi, P., Machens, C. K. & Denève, S. Learning to represent signals spike  
568 by spike. *PLoS Comput. Biol.* **16**, e1007692 (2020).

- 569 **111.** Heekeren, H. R., Marrett, S., Bandettini, P. A. & Ungerleider, L. G. A general mechanism for perceptual  
570 decision-making in the human brain. *Nature* **431**, 859–862 (2004).
- 571 **112.** Krotov, D. & Hopfield, J. J. Dense associative memory for pattern recognition. In *Advances in Neural*  
572 *Information Processing Systems (NeurIPS)*, vol. 29, 1172–1180 (2016).
- 573 **113.** Soto, V., Suárez, A. & Martínez-Muñoz, G. An urn model for majority voting in classification ensembles.  
574 In *Advances in Neural Information Processing Systems (NeurIPS)* (Neural Information Processing Systems  
575 Foundation, 2016).
- 576 **114.** Bengio, Y., Mesnard, T., Fischer, A., Zhang, S. & Wu, Y. Stp as presynaptic activity times rate of change of  
577 postsynaptic activity. *arXiv preprint arXiv:1509.05936* (2015).
- 578 **115.** Penrose, R. A generalized inverse for matrices. In *Mathematical proceedings of the Cambridge philosophical*  
579 *society*, vol. 51, 406–413 (Cambridge University Press, 1955).



## 580 Methods

581 This section provides necessary details for replication of results in the main text.

### 582 Models

583 Throughout this work, we compare the established theory of *backpropagation* to the proposed new  
584 principle of *prospective configuration*. As explained in the main text, backpropagation is used to train  
585 *artificial neural networks* (ANNs), where the activity of a neuron is *fixed* to a value based on its input,  
586 while prospective configuration occurs in *energy-based networks* (EBNs), where the activity of a neuron is  
587 *not* fixed.

588 Since in ANNs the activity of neurons  $\mathbf{x}$  is determined by their input, the output of the network can  
589 be obtained by propagating the inputs “forward” through the computational graph. The output can then  
590 be compared against a target pattern to get a measure of difference known as a *loss*. Since the value of a  
591 node (activity of a neuron) in the computational graph is explicitly computed as a function of its input, the  
592 computational graph is usually differentiable. Thus, training ANNs with backpropagation modifies the  
593 weights  $\mathbf{w}$  to take a step towards the negative gradient of loss  $L$ ,

$$\Delta \mathbf{w} \sim -\frac{\partial L}{\partial \mathbf{w}}, \quad (1)$$

594 during which the activity of neurons  $\mathbf{x}$  is fixed. The weights  $\mathbf{w}$  requiring modification might be many  
595 steps away from the output on the computational graph, where the loss  $L$  is computed; thus,  $\frac{\partial L}{\partial \mathbf{w}}$  is often  
596 obtained by applying the chain rule of computing a derivative through intermediate variables (activity of  
597 output and hidden neurons). For example, consider a network with 4 layers and let  $\mathbf{x}^l$  denote the activity  
598 of neurons in layer  $l$ , while  $\mathbf{w}^l$  denote the weights of connections between layers  $l$  and  $l + 1$ . Then the  
599 change in the weights originating from the first layer is computed:  $\frac{\partial L}{\partial \mathbf{w}^1} = \frac{\partial L}{\partial \mathbf{x}^4} \cdot \frac{\partial \mathbf{x}^4}{\partial \mathbf{x}^3} \dots \frac{\partial \mathbf{x}^2}{\partial \mathbf{w}^1}$ . This enables  
600 the loss to be backpropagated through the graph to provide a direction of update for all weights.

601 In contrast to ANNs, in EBNs, the activity of neurons  $\mathbf{x}$  is not fixed to the input from a previous layer.  
602 Instead, an energy function  $E$  is defined as a function of the neural activity  $\mathbf{x}$  and weights  $\mathbf{w}$ . For networks  
603 organized in layers (considered in this paper), the energy can be decomposed into a sum of local energy  
604 terms  $E^l$ :

$$E = \sum_l E^l(\mathbf{x}^l, \mathbf{w}^{l-1}, \mathbf{x}^{l-1}). \quad (2)$$

605 Here,  $E^l$  is called local energy, because it is a function of  $\mathbf{x}^l$ ,  $\mathbf{x}^{l-1}$ , and  $\mathbf{w}^{l-1}$  that are neighbours and  
606 connected to each other. This ensures that the optimization of energy  $E$  can be implemented by local  
607 circuits, because the derivative of  $E$  with respect to any neural activity (or weights) results in an equation  
608 containing only the local activity (or weights) and the activity of adjacent neurons. Predictions with EBNs  
609 are computed by clamping the input neurons to an input pattern, and then modifying the activity of all  
610 other neurons to decrease the energy:

$$\Delta \mathbf{x} \sim -\frac{\partial E}{\partial \mathbf{x}}. \quad (3)$$

611 Since the terms in  $E$  can be divided into local energy terms, this results in an equation that can be  
612 implemented with local circuits. This process of modifying the neural activity to decrease the energy is  
613 called *relaxation*, and we refer to the equation describing relaxation as *neural dynamics* — because it  
614 describes the dynamics of the neural activity in EBNs. After convergence of relaxation, the activities of

615 the output neurons are taken as the prediction made by the EBN. Different EBNs are trained in slightly  
 616 different ways. In case of *predictive coding network*<sup>30,43,55</sup> (PCN), training involves clamping the input  
 617 and output neurons to input and target patterns, respectively. Then, relaxation is run until convergence  
 618 ( $\mathbf{x} = \mathbf{x}^*$ ), after which the weights are updated using the activity at convergence to further decrease the  
 619 energy:

$$\Delta \mathbf{w} \sim - \left. \frac{\partial E}{\partial \mathbf{w}} \right|_{\mathbf{x}=\mathbf{x}^*}. \quad (4)$$

620 This will also result in an equation that can be implemented with local plasticity since it is just a gradient  
 621 descent on the local energy. We refer to such an equation as *weight dynamics*, because it describes the  
 622 dynamics of the synaptic weights in EBNs.

623 Backpropagation and prospective configuration are not restricted to specific models. Depending on  
 624 the structure of the network, and the choice of the energy function, one can define different models that  
 625 implement the principle of backpropagation or prospective configuration. In the main text and most of the  
 626 Extended Data, we investigate the most standard layered network. In this case, both ANNs and EBNs  
 627 include  $L$  layers of weights  $\mathbf{w}^1, \mathbf{w}^2, \dots, \mathbf{w}^L$ , and  $L+1$  layers of neurons  $\mathbf{x}^1, \mathbf{x}^2, \dots, \mathbf{x}^{L+1}$ , where  $\mathbf{x}^1$  and  $\mathbf{x}^{L+1}$   
 628 are the input and output neurons, respectively. We consider the relationship between activities in adjacent  
 629 layers for ANNs given by

$$\mathbf{x}^l = \mathbf{w}^{l-1} f(\mathbf{x}^{l-1}), \quad (5)$$

630 and the energy function for EBNs described by

$$E^l = \frac{1}{2} \left( \mathbf{x}^l - \mathbf{w}^{l-1} f(\mathbf{x}^{l-1}) \right)^2. \quad (6)$$

631 This defines the ANNs to be the standard *multilayer perceptrons* (MLPs) and the EBNs to be the PCN.  
 632 In Eq. (6) and below,  $(\mathbf{v})^2$  denotes the inner product of vector  $\mathbf{v}$  with itself. The comparison between  
 633 backpropagation and prospective configuration in the main text is thus between the above MLPs and PCNs.  
 634 This choice is justified by that (1) they are the most standard models<sup>88</sup> and also (2) it is established that  
 635 they two are closely related<sup>30,37</sup> (i.e., they make the same prediction with the same weights and input  
 636 pattern), thus enabling a fair comparison. Nevertheless, we show that the theory (Extended Data Fig. 1)  
 637 and empirical comparison (Extended Data Figs. 3 and 4) between backpropagation and prospective  
 638 configuration generalize to other choices of network structures and energy functions, i.e., other EBNs and  
 639 ANNs, such as *GeneRec*<sup>89</sup> and *Almeida-Pineda*<sup>90-92</sup>.

640 Putting Eqs. (5) and (6) into the general framework, we can obtain the equations that describe MLPs  
 641 and PCNs, respectively. Assume the input and target patterns are  $\mathbf{s}^{\text{in}}$  and  $\mathbf{s}^{\text{target}}$ , respectively. Prediction  
 642 with MLPs is:

$$\mathbf{x}^1 = \mathbf{s}^{\text{in}} \text{ and } \mathbf{x}^l = \mathbf{w}^{l-1} f(\mathbf{x}^{l-1}) \text{ for } l > 1, \quad (7)$$

643 where  $\mathbf{x}^{L+1}$  is the prediction. Training MLPs with backpropagation is described by:

$$\Delta \mathbf{w}^l \sim - \frac{\partial L}{\partial \mathbf{w}^l} = - \frac{\partial L}{\partial \mathbf{x}^{L+1}} \cdot \frac{\partial \mathbf{x}^{L+1}}{\partial \mathbf{x}^L} \dots \frac{\partial \mathbf{x}^{L+1}}{\partial \mathbf{w}^l} \text{ where } L = \frac{1}{2} (\mathbf{x}^{L+1} - \mathbf{s}^{\text{target}})^2, \quad (8)$$

644 which backpropagates the error  $\frac{\partial L}{\partial \mathbf{x}^l}$  layer by layer from output neurons.

645 The neural dynamics of PCNs can be obtained using Eq. (2):

$$\Delta \mathbf{x}^l \sim -\frac{\partial E}{\partial \mathbf{x}^l} = -\frac{\partial (E^l + E^{l+1})}{\partial \mathbf{x}^l}. \quad (9)$$

646 Similarly, the weight dynamics of PCNs can be found:

$$\Delta \mathbf{w}^l \sim -\frac{\partial E}{\partial \mathbf{w}^l} = -\frac{\partial E^{l+1}}{\partial \mathbf{w}^l}. \quad (10)$$

647 To reveal the neural implementation of PCN, we define the prediction errors to be

$$\boldsymbol{\varepsilon}^l = \mathbf{x}^l - \mathbf{w}^{l-1} f(\mathbf{x}^{l-1}). \quad (11)$$

648 The neural and weight dynamics of PCN can be expressed (by evaluating derivatives in Eqs. (9) and (10)):

$$\Delta \mathbf{x}^l \sim -\boldsymbol{\varepsilon}^l + f'(\mathbf{x}^l) \circ (\mathbf{w}^l)^T \boldsymbol{\varepsilon}^{l+1} \quad (12)$$

649

$$\Delta \mathbf{w}^l \sim \boldsymbol{\varepsilon}^{l+1} \left( f(\mathbf{x}^l) \right)^T, \quad (13)$$

650 where the symbol  $\circ$  denotes element-wise multiplication. Assuming that  $\boldsymbol{\varepsilon}^l$  and  $\mathbf{x}^l$  are encoded in the  
 651 activity of error and value neurons, respectively, Eqs. (11) and (12) can be realized with the neural  
 652 implementation in Fig. 2c bottom. Particularly, error  $\boldsymbol{\varepsilon}$  and value  $\mathbf{x}$  neurons are represented by red and blue  
 653 nodes, respectively; excitatory + and inhibitory - connections are represented by connections with solid  
 654 and hollow nodes, respectively. Thus, Eqs. (11) and (12) are implemented with red and blue connections,  
 655 respectively. It should also be noticed that the weight dynamics is also realized locally: weight change  
 656 described by Eq. (13) corresponds to simple Hebbian plasticity<sup>93</sup> in the neural implementation of Fig. 2c  
 657 bottom, i.e., the change in a weight is proportional to the product of activity of pre-synaptic and post-  
 658 synaptic neurons. Thus, a PCN, as an EBN, can be implemented with local circuits only, due to the local  
 659 nature of energy terms (as argued earlier in this section).

660 In all simulations in this paper (unless stated otherwise), the integration step of the neural dynamics in  
 661 Eq. (12) (i.e., relaxation) is 0.1, and the relaxation is performed for 128 steps. During the relaxation, if the  
 662 overall energy is not decreased from the last step, the integration step is reduced by 50%; if the integration  
 663 step is reduced two times (i.e., reaching 0.025), the relaxation is terminated early. By monitoring the  
 664 number of relaxation steps performed, we notice that in most of the tasks we performed, the relaxation is  
 665 terminated early at around 60 iterations.

666 In the Extended Data, we also investigate other choices of network structures and energy functions,  
 667 resulting in other ANNs and EBNs. Overall, the EBNs investigated include PCNs<sup>30,43,55</sup>, target-PCNs,  
 668 and *GeneRec*<sup>89</sup>, and the ANNs investigated include backpropagation and *Almeida-Pineda*<sup>90-92</sup>. Details  
 669 of all the models can be found in corresponding previous work, and are also given in the Supplementary  
 670 Materials (SI) 2.1.

### 671 Interference and measuring interference (i.e., target alignment) (Fig. 3)

672 In Fig. 3a, since it simulates the example in Fig. 1, structure of the network is 1-1-2; weights are all  
 673 initialized to 1; input pattern is [1] and target pattern is [0, 1]. Learning rates of both learning rules are 0.2,  
 674 and the weights are updated for 24 iterations.

675 In Fig. 3d, there are 64 neurons in each layer (including input and output layers) for each network;  
676 weights are initialized via Xavier uniform initialization<sup>94</sup>. No activation function is used, i.e., linear  
677 networks are investigated. Depths of networks ( $L$ ) are searched from  $\{1, 2, 4, 6, 8, 10, 12, 14, 15\}$ , as  
678 reported on the x-axis. Input and target patterns are a pair of randomly generated patterns of mean 0 and  
679 standard deviation 1. Learning rates of both learning rules are 0.001. Weights are updated for one iteration  
680 and target alignment is measured for this iteration for each of the 64 datapoints, then averaged over the 64  
681 datapoints to produce the reported target alignment value. The whole experiment is repeated 3 times and  
682 the error bars report the standard error.

683 Simulations in Fig. 3e-f follow the setup of experiments in Fig. 4, thus, are described at the end of the  
684 next section.

### 685 **Biologically relevant tasks (Fig. 4)**

686 In all supervised learning simulations in Fig. 4a-h, models are trained and tested on two datasets, FashionMNIST<sup>65</sup>  
687 and CIFAR-10<sup>95</sup>. With FashionMNIST, models are trained to perform classification of  
688 gray-scaled fashion item images into 10 categories such as trousers, pullovers and dresses. FashionMNIST  
689 is chosen because it is of moderate and appropriate difficulty for multi-layer non-linear deep neural  
690 networks, so that the comparisons with EBNs are informative. Classification of data in CIFAR-10 is more  
691 difficult, as it contains colored natural images belonging to categories such as cars, birds and cats. Both  
692 datasets consist of 60000 training examples (i.e., training set) and 10000 test examples (i.e., test set).

693 The experiments in Fig. 4a-h follow the configurations below, except for the parameters investigated in  
694 specific panels (such as batch size, size of the dataset, and size of the architecture), which are adjusted  
695 as stated in the description of specific experiments. The neural network is composed of 4 layers and 32  
696 hidden neurons in each hidden layer. The size of the input layer is  $28 \times 28$  for FashionMNIST<sup>65</sup> and  
697  $32 \times 32$  for CIFAR-10<sup>66</sup> (both datasets are gray-scaled). The size of the output layer is 10, as the number of  
698 classes for both datasets. The weights are initialized from a normal distribution with mean 0 and standard  
699 deviation  $\sqrt{\frac{2}{n^l + n^{l+1}}}$ , where  $n^l$  and  $n^{l+1}$  are the number of neurons of the layer before and after the weight,  
700 respectively. This initialization is known as Xavier normal initialization<sup>94</sup>. The activation function  $f()$  is  
701 *Sigmoid*. We define one *iteration* as updating the weights for one step based on a mini-batch. The number  
702 of examples in a mini-batch, called the batch-size, is by default 32. One *epoch* comprises presenting the  
703 entire training set, split over multiple mini-batches. At the end of each epoch, the model is tested on the  
704 test set and the classification error is recorded as the “test error” of this epoch. The neural network is  
705 trained for 64 epochs; thus, ending up with 64 test errors. The mean of the test error over epochs, i.e.,  
706 during training progress, is an indicator of how fast the model learns. The minimum of the test errors  
707 over epochs is an indicator of how well the model can learn, ignoring the possibility of over-fitting due to  
708 training for too long. Learning rates are searched independently for each configuration and each model.  
709 Each experiment is repeated 10 times (unless stated otherwise), and the error bars represent standard error.

710 We now describe settings specific to individual experiments. In Fig. 4b different batch sizes are tested  
711 (as shown on x-axis). In Fig. 4c the batch size is set to 1. In Fig. 4d different numbers of data points per  
712 class (data points per class) are included into the training set (subsets are randomly selected according  
713 to different seeds). In Figs. 4e–f investigating concept drifting<sup>62,96,97</sup>, changes to class labels are made  
714 every 512 epochs, and the models are trained for 4096 epochs in total. Thus, every 512 epochs, 5 out of  
715 10 output neurons are selected, and the mapping from these 5 output neurons to the semantic meaning is  
716 pseudo-randomly shuffled. In continual learning of Fig. 4g, training alternates between two tasks. Task  
717 1 is classifying five randomly selected classes in a dataset, and task 2 is classifying the remaining five  
718 classes. The whole network is shared by the two tasks, thus, differently from the network used in other

719 panels, the network only has 5 output neurons. This better corresponds to continual learning with multiple  
720 tasks in nature, because, for example, if humans learn to perform two different tasks, they typically use the  
721 one brain and one pair of hands (i.e., the whole network is shared), since they do not have two different  
722 pairs of hands (i.e., humans share the output layers across tasks). Task 1 is trained for 4 iterations and then  
723 task 2 is trained for 4 iterations, and the training continues until total of 84 iterations is reached. After  
724 each iteration, error on the test set of each task is measured, as “test error”. In Fig. 4h, the mean of test  
725 error of both tasks during training of Fig. 4g at different learning rates is reported.

726 In Fig. 3e, networks of 15 layers are trained and tested on FashionMNIST<sup>65</sup> dataset. Fig. 3f investigates  
727 other network depths ( $\{1, 2, 4, 6, 8, 10, 12, 14, 15\}$ ) in the same setup. Hidden layers are always of size 64.  
728 In this experiment, only part of the training set was used (60 datapoints per class) so that the test error is  
729 evaluated more frequently to reflect the difference on efficiency of the investigated learning rules. The  
730 activation function  $f(\cdot)$  used is *LeakyReLU*, instead of the standard Sigmoid, because Sigmoid results in  
731 difficulty in training deep neural networks. Other unmentioned details follows the defaults as described  
732 above.

733 In the reinforcement learning experiments (Fig. 4i), we evaluate performance on three classic rein-  
734 forcement learning problems: Acrobot<sup>98,99</sup>, MountainCar<sup>100</sup>, and CartPole<sup>101</sup>. We interact with these  
735 environments via a unified interface by OpenAI Gym<sup>102</sup>. The observations  $s_t$  of these environments are  
736 vectors describing the status of the system, such as velocities and positions of different moving parts (for  
737 details refer to the original articles or documentation from OpenAI Gym). Each entry of the observation  $s_t$   
738 is normalized to mean 0 and standard deviation 1 via Welford’s online algorithm<sup>103,104</sup>. The action space  
739 of these environments is discrete. Thus, we can have a network taking in observation  $s_t$  and predicting the  
740 value ( $Q$ ) of each action  $a_t$  with different output neurons. Such a network is known as an action-value  
741 network, in short, a  $Q$  network. In our experiment, the  $Q$  network contains two hidden layers, each of  
742 which contains 64 neurons, initialized the same way as the network used for supervised learning, described  
743 before. One can acquire the value of an action  $a_t$  at a given observation  $s_t$  by feeding in  $s_t$  to the  $Q$  network  
744 and reading out the prediction on the output neuron corresponds to the action  $a_t$ , such value is denoted  
745 by  $Q(s_t, a_t)$ . The training of  $Q$  is a simple regression problem to target  $\hat{R}_t$ , obtained via  $Q$ -learning with  
746 experience replay (summarized in Algorithm 1). Considering  $s_t$  to be  $s^{\text{in}}$  and  $\hat{R}_t$  to be  $s^{\text{target}}$ , the  $Q$  network  
747 can be trained with prospective configuration or backpropagation. Note that  $\hat{R}_t$  is the target of the selected  
748 action  $a_t$  (i.e., the target of one of the output neurons corresponds to the selected action  $a_t$ ), thus,  $\hat{R}_t$  is in  
749 practice considered to be  $s^{\text{target}}[a_t]$ . For prospective configuration, it means the rest of the output neurons  
750 except the one corresponding to  $a_t$  are freed; for backpropagation, it means the error on these neurons are  
751 masked out.

752 PCN of slightly different settings from the defaults is used for prospective configuration: the integration  
753 step is fixed to be half of the default ( $=0.05$ ), and relaxation is performed for a fixed and smaller number  
754 of steps ( $=32$ ). This change is introduced because  $Q$ -learning is more unstable (so smaller integration  
755 step) and more expensive (so smaller number of relaxation steps) than supervised learning tasks. To  
756 produce a smoother curve of “Sum of rewards per episode” in Fig. 4i from the *SumRewardPerEpisode*  
757 in Algorithm 1, the *SumRewardPerEpisode* curve along *TrainingEpisode* are averaged with a sliding  
758 window of length 200. Each experiment is repeated with 3 random seeds and the shadows represents  
759 standard error across them. Learning rates are searched independently for each environment and each  
760 model from the range  $\{0.05, 0.01, 0.005, 0.001, 0.0005, 0.0001\}$ ; and the results reported in Fig. 4i are for  
761 the learning rates yielding the highest mean of “Sum of rewards per episode” over training episodes.



---

**Algorithm 1:** *Q*-learning with experience replay.

---

**Input:** Action-value network  $Q$ .  
**Result:** Trained action-value network  $Q$ .

```
1 Initialize experience replay  $\mathcal{R}$  of capacity 50000;  
2 for  $TrainingEpisode = 0$ ;  $TrainingEpisode < 10000$ ;  $TrainingEpisode = TrainingEpisode + 1$   
   do  
3    $\rho = \max(0.01, 0.08 - 0.01 * (TrainingEpisode/200))$ ; // Anneal probability of exploring  
4   Get initial observation  $s_t$  and set episode termination signal  $d_t = False$ ;  
5   Initialize  $SumRewardPerEpisode = 0$ ;  
6   while !  $d_t$  do // Collect experience  
7     With probability  $\rho$  sample a random action  $a_t$ , otherwise select  $a_t = \arg \max_a Q(s_t, a)$ ;  
8     Execute  $a_t$ , observe reward  $r_t$ , new observation  $s_{t+1}$  and  $d_t$ ;  
9     Accumulate  $SumRewardPerEpisode += r_t$ ;  
10    Store transition  $(s_t, a_t, r_t, s_{t+1}, d_t)$  in  $\mathcal{R}$ ;  
11    Set  $s_t = s_{t+1}$ ;  
12  end  
13  if  $length(\mathcal{R}) > 2000$  then // Replay and train  
14    for  $epoch = 0$ ;  $epoch < 10$ ;  $epoch = epoch + 1$  do  
15      Sample random minibatch (size=60) of  $(s_t, a_t, r_t, s_{t+1}, d_t)$  from  $\mathcal{R}$ ;  
16       $\hat{R}_t = \begin{cases} r_t, & \text{if } d_t == True \\ r_t + 0.98 \max_a Q(s_{t+1}, a), & \text{otherwise} \end{cases}$ ;  
17      Set  $s^{in} = s_t$ ;  
18      Set  $s^{target}[a_t] = \hat{R}_t$ ;  
19      Train  $Q$  with  $s^{in}$  and  $s^{target}[a_t]$  with prospective configuration or backpropagation;  
20    end  
21  end  
22  Report  $SumRewardPerEpisode$ ;  
23 end
```

---

762

### 763 Simulation of motor learning (Fig. 5)

764 As shown in Fig. 5, we train a network that includes 2 input, 2 hidden, and 2 output neurons. The two  
765 input neurons are one-to-one connected to the two hidden neurons, and the two hidden neurons are fully  
766 connected to the two output neurons. The two input neurons are considered to encode presenting the  
767 blue and red background, respectively. The two output neurons are considered to encode the prediction  
768 of the perturbations towards positive and negative directions, respectively. Presenting or not presenting  
769 a background color are encoded as 1 and 0 respectively; presenting or not presenting perturbations of  
770 a particular direction are encoded as 1 and 0, respectively. The weights are initialized from a normal  
771 distribution with mean 0 and standard deviation fitted to behavioural data (see below), simulating that the  
772 participants have not built any associations before the experiments. Learning rates are independent for  
773 the two layers, as we expect the connections from perception to belief and the connections from belief to  
774 predictions to have different degree of plasticity. The two learning rates are also fitted to the data (see  
775 below).

776 The number of participants, training and testing trials follow exactly the human experiment<sup>75</sup>. In  
777 particular, for each of 24 simulated participants, the weights are initialized with a different seed of the

778 random number generator. They each experience two stages: training and testing. Note that the pre-training  
779 stage performed in the human experiment is not simulated here as its goal was to make human participants  
780 familiar with the setup and devices.

781 In the training stage, the model experiences 24 blocks of trials. In each block, the model is presented  
782 with the following sequence of trials, matching the original experiment<sup>75</sup>.

- 783 • The model is trained with two trials without perturbation: B0 and R0, with order counterbalanced  
784 across consecutive blocks. Note that in the human experiment there were two trial types without  
785 perturbations (channel and washout trials), but they are simulated in the same way here as B0 or R0  
786 trials, because they both did not include any perturbations.
- 787 • The model is trained with 32 trials with perturbations, where there are equal number of B+ and R-  
788 within each 8 trials in a pseudorandom order.
- 789 • The model experiences two trials: B0 and R0, with order counterbalanced across consecutive blocks.
- 790 • The model experiences  $n \leftarrow \{14, 16, 18\}$  washout trials (equal number of B0 and R0 trials in a  
791 pseudorandom order), where  $n \leftarrow \{a, b, c\}$  denotes sampling without replacement from a set of  
792 values  $a$ ,  $b$  and  $c$ , and replenishing the set whenever becomes empty.
- 793 • The model experiences one triplet, where the exposure trial is either B+ or R-, counterbalanced  
794 across consecutive blocks. Here, a triplet consists three sequential trials: B0, the specified exposure  
795 trial and again B0.
- 796 • The model experiences again  $n \leftarrow \{6, 8, 10\}$  washout trials (equal number of B0 and R0 trials in a  
797 pseudorandom order).
- 798 • The model experiences again one triplet, where the exposure trial is either B+ or R-, whichever was  
799 not used on the previous triplet.

800 Then, in the testing stage, the model experiences 8 repetitions of four blocks of trials. In each block,  
801 one of combinations B+, R+, B- and R- is tested. The order of the four blocks is shuffled in each of  
802 the 8 repetitions. In each block, the model first experiences  $n \leftarrow \{2, 4, 6\}$  washout trials (equal number  
803 of B0 and R0 trials in a pseudorandom order). Then the model experiences a triplet of trials, where  
804 the exposure trial is the combination (B+, R+, B- or R-) tested in a given block, to assess single trial  
805 learning of this combination. The change in adaption in the model is computed as the absolute value  
806 of the difference in the predictions of perturbations on the two B0 trials in the above triplet, where the  
807 prediction of perturbation is computed as the difference between the activities of the two output neurons.  
808 The predictions are averaged over participants and the above repetitions.

809 The parameters of each learning rule are chosen such that the model best reproduces the change in  
810 adaptation shown in Fig 5f. In particular, we minimize the sum over set  $C$  of the 4 exposure trial types of  
811 the squared difference between average change in adaptation in experiment ( $d_c$ ) and in the model ( $x_c$ ):

$$\sum_{c \in C} (ax_c - d_c)^2 \quad (14)$$

812 The model predictions are additionally scaled by a coefficient  $a$  fitted to the data, because the behavioural  
813 data and model outputs have different scales. Exhaustive search was performed over model parame-  
814 ters: standard deviation of initial weights and two learning rates for two layers could take values from  
815  $\{0.01, 0.05, 0.1\}$ . Then, for each learning rule and each combination of the above model parameters, the  
816 coefficient  $a$  is resolved analytically (restricted to be positive) to minimize the sum of the squared errors  
817 of Eq. (14).

## 818 **Simulation of fear conditioning (Fig. 6)**

819 As shown in Fig. 6c, the simulated network includes 2 input, 2 hidden, and 1 output neurons. The weights  
820 are initialized from a normal distribution of mean 0 and standard deviation 0.01, reflecting that the animals

821 have not built an association between stimulus and electric shock before the experiments. Presenting or not  
822 presenting the stimulus (noise, light, or shock) is encoded as 1 and 0, respectively. The two input neurons  
823 are considered to be the visual and auditory neurons; thus, their activity corresponds to perceiving light  
824 and noise, respectively. The output neuron is considered to encode the prediction of the electric shock.  
825 The training and extinction sessions are both simulated for 32 iterations with the learning rate of 0.01. In  
826 the test session, the model makes a prediction with the presented stimulus (noise only). As in the previous  
827 section, we denote by  $x_c$  the prediction for each group  $c$  from a set  $C = \{N+, LN+, LN+L-\}$ . To map  
828 the prediction to the percentage of freezing, it is scaled by a coefficient  $a$  (as the neural activity and the  
829 measure of freezing have different units) and shifted by a bias  $b$  (as the rats may have some tendency to  
830 freeze after salient stimuli even if they had not been associated with a shock). The numbers reported in  
831 Fig. 6b are these scaled predictions. The coefficient  $a$  (constrained to be positive) and bias  $b$  are optimized  
832 for prospective configuration and backpropagation independently, analogously as described in the previous  
833 section, i.e. their values that minimize summed squared error given below are found analytically.

$$\sum_{c \in C} (ax_c + b - d_c)^2 \quad (15)$$

### 834 **Simulation of human reinforcement learning (Fig. 7)**

835 As shown in Fig. 7b, we train a network that includes 1 input, 1 hidden, and 2 output neurons. The input  
836 neuron is considered to encode being in the task, so it is set to 1 throughout the simulation. The two output  
837 neurons encode the prediction of the value of the two choices. Reward and punishment are encoded as 1  
838 and  $-1$ , respectively, because the participants were either winning or losing money. The model selects  
839 actions stochastically based on the predicted value of the two choices (encoded in the activity of two  
840 output neurons) according to the softmax rule (with temperature of 1). The weights are initialized from a  
841 normal distribution of mean 0 and standard deviation fitted to experimental data (see below), simulating  
842 that the human participants have not built any associations before the experiments. Number of simulated  
843 participants (number of repetitions with different seeds) was set to 16 as in the human experiment<sup>75</sup>. The  
844 number of trials is not mentioned in the original paper, so we simulate for 128 trials for both learning  
845 rules.

846 To compare the ability of the two learning rules to account for the pattern of signal from mPFC, for  
847 each of the rules, we optimized the parameters describing how the model is set up and learns (the standard  
848 deviation of initial weights and the learning rate). Namely, we searched for the values of these parameters  
849 for which the model produces the most similar pattern of its output activity to that in the experiment. In  
850 particular, we minimized the sum over set  $C$  of four trial types in Fig. 7c of the squared difference between  
851 model predictions  $x_c$  and data  $d_c$  on mean mPFC signal (Eq. (15)). The model predictions are additionally  
852 scaled by a coefficient  $a$  and offset by a bias  $b$ , because the fMRI signal had different units and baseline  
853 than the model. To compute the model prediction for a given trial type, the activity of the output neuron  
854 corresponding to the chosen option is averaged across all trials of this type in the entire simulation. The  
855 scaled average activity from the model is plotted in Fig. 7c, where the error bars show the standard error of  
856 the scaled activity. To fit the model to experimental data, the values of model parameters and the coefficient  
857 were found analogously as described in the previous section. In particular, we employ exhaustive grid  
858 search on the parameters. The models is simulated for all possible combinations of standard deviation of  
859 initial weights, and the learning rate, from the following set:  $\{0.01, 0.05, 0.1\}$ . Then, for each learning  
860 rule and each combination of the above model parameters, the coefficient  $a$  (restricted to be positive) and  
861 the bias  $b$  are resolved analytically to minimize sum of the squared error of Eq. (15).

## 862 **Data availability**

863 Learning tasks analysed in Fig. 4a-h were built using the publicly available FashionMNIST<sup>65</sup> and CIFAR-  
864 10<sup>66</sup> datasets. They are incorporated in most machine learning libraries, and their original releases  
865 are available at <https://github.com/zalandoresearch/fashion-mnist> and <https://www.cs.toronto.edu/~kriz/cifar.html>, respectively. Reinforcement learning tasks analysed  
866 in Fig. 4i were built using the publicly available simulators by OpenAI Gym<sup>102</sup>.  
867

## 868 **Code availability**

869 Complete code and full documentation reproducing all simulation results will be made publicly available at  
870 <https://github.com/YuhangSong/A-New-Perspective> upon publication of this work. It  
871 will be released under GNU General Public License v3.0 without any additional restrictions (for license's  
872 details see <https://opensource.org/licenses/GPL-3.0> by the open source initiative).

## 873 **Acknowledgements**

874 We thank Timothy Behrens for comments on the manuscript, and Andrew Saxe for discussions. Yuhang  
875 Song was supported by the China Scholarship Council under the State Scholarship Fund and J.P. Morgan  
876 AI Research Awards. Beren Millidge and Rafal Bogacz were supported by the the Biotechnology  
877 and Biological Sciences Research Council grant BB/S006338/1 and Medical Research Council grant  
878 MC\_UU\_00003/1. Thomas Lukasiewicz and Tommaso Salvatori were supported by the Alan Turing  
879 Institute under the EPSRC grant EP/N510129/1 and by the AXA Research Fund. Zhenghua Xu was  
880 supported by National Natural Science Foundation of China under the grant 61906063, by the Natural  
881 Science Foundation of Hebei Province, China, under the grant F2021202064, by the Natural Science  
882 Foundation of Tianjin City, China, under the grant 19JCQNJC00400, by the “100 Talents Plan” of Hebei  
883 Province, China, under the grant E2019050017, and by the Yuanguang Scholar Fund of Hebei University  
884 of Technology, China.

## 885 **Author contributions**

886 Y.S. and R.B. conceived the project. Y.S., R.B., B.M. and T.S. contributed ideas for experiments and  
887 analysis. Y.S. and B.M. performed simulation experiments and analysis. Y.S., T.L, and R.B. managed the  
888 project. T.L, and Z.X. advised on the project. Y.S., R.B. and B.M. wrote the paper. T.S., T.L, and Z.X.  
889 provided revisions to the paper.

## 890 **Competing interests**

891 The authors declare no competing interests.

## 892 **Additional information**

893 **Extended Data Figures/Tables** is available for this paper in the same file (Section 1).

894 **Supplementary Information** is available for this paper in the same file (Section 2).

895 **Correspondence and requests** for materials should be addressed to Y.S. and R.B.

## 896 1 Extended Data

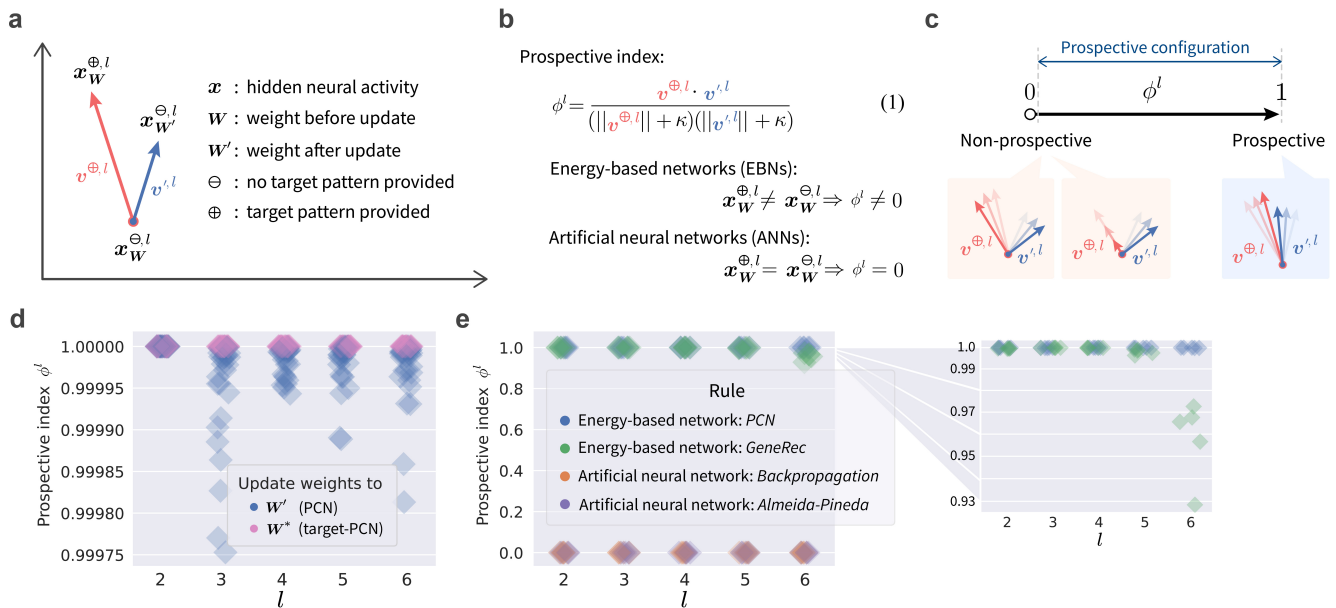

Extended Data Fig. 1

897 **Formal definition of prospective configuration.** Formal definition of prospective configuration with  
 898 prospective index (panels a–c), a metric that one can measure for any learning model. With this metric,  
 899 we show that prospective configuration is present in different *energy-based networks* (EBNs), but not in  
 900 *artificial neural networks* (ANNs) (panels d–e).

901 ▶ **a** | To introduce the prospective index, we consider the hidden neural activity  $x^l$  in layer  $l$ , in three  
 902 moments of time. First, a learning iteration starts from  $x^l$  under the current weights  $W$  without target  
 903 pattern provided  $\ominus$ :  $x_W^{\ominus,l}$ . Second, a target pattern is provided  $\oplus$ , and neural activity settles to  $x_W^{\oplus,l}$ . Third,  
 904  $W$  is updated to  $W'$ , the target pattern is removed  $\ominus$ , and the neural activity settles to  $x_{W'}^{\ominus,l}$ . We define two  
 905 vectors  $v^{\oplus,l}$  and  $v'^{l}$ , representing the direction of the neural activity's changes as a result of the target  
 906 pattern being given  $\ominus \rightarrow \oplus$  and the weights being updated  $W \rightarrow W'$ , respectively.

907 ▶ **b** | The prospective index  $\phi^l$  is the cosine similarity of  $v^{\oplus,l}$  and  $v'^{l}$ . A small constant  $\kappa = 0.00001$   
 908 is added in the denominator to ensure that the prospective index is still defined if the length of one of the  
 909 vectors is 0 (in which case the prospective index is equal to 0). For EBNs, the neural activity settles to a  
 910 new configuration when the target pattern is provided, i.e.,  $x_W^{\oplus,l} \neq x_W^{\ominus,l}$ , so  $\phi^l$  is non-zero; for ANNs, the  
 911 neural activity stays unchanged when the target pattern is provided, i.e.,  $x_W^{\oplus,l} = x_W^{\ominus,l}$ , so  $\phi^l$  is zero.

912 ▶ **c** | A positive  $\phi^l$  implies that  $v^{\oplus,l}$  and  $v'^{l}$  are pointing in the same direction, i.e., the neural activity  
 913 after the target pattern provided  $x_W^{\oplus,l}$  is similar to the neural activity after the weight update  $x_{W'}^{\ominus,l}$ , i.e., is  
 914 prospective. We define the models following the principle of prospective configuration as those with  
 915 positive  $\phi^l$  (averaged over all layers). Additionally, prospective index close to 1 implies that a weight  
 916 update rule in a model is able to consolidate the pattern of activity following relaxation, so a similar pattern  
 917 is reinstated during prediction on the next trial.

918 ▶ **d** | The prospective index  $\phi^l$  of different layers  $l$  in PCNs and a variant of PCNs called target-PCNs.  
 919 Several observations can be made, and they are explained and proved in SI 2.3.

920 ▶ **e** | The prospective index  $\phi^l$  of different EBNs and ANNs. Here, we can see that all EBNs produce  
 921 positive  $\phi^l$ , i.e., the prospective configuration is commonly observed in EBNs, but not in ANNs.



922 **Implementation details.** We train various models to predict a target pattern from an input pattern (both  
923 randomly generated from  $\mathcal{N}(0, 1)$  and of 32 entries). The structure of the networks is  $32 \rightarrow 32 \rightarrow 32 \rightarrow$   
924  $32 \rightarrow 32 \rightarrow 32 \rightarrow 32$ . The weights are initialized using Xavier normal initialization<sup>94</sup> (described in the  
925 Methods). The models were trained for one iteration (i.e., one update of the weights), the prospective index  
926 was then measured for this update. Prospective indices of input and output layers are not reported. This is  
927 because the input and output layers are held fixed during learning; thus, the prospective index is not defined  
928 for them. Experiments were repeated 20 times. The EBNs investigated include PCNs<sup>30,43,55</sup>, target-PCNs,  
929 and *GeneRec*<sup>89</sup>, while the ANNs investigated include backpropagation and *Almeida-Pineda*<sup>90-92</sup>. Details  
930 of all simulated models are given in Section 2.1 of Supplementary Information.

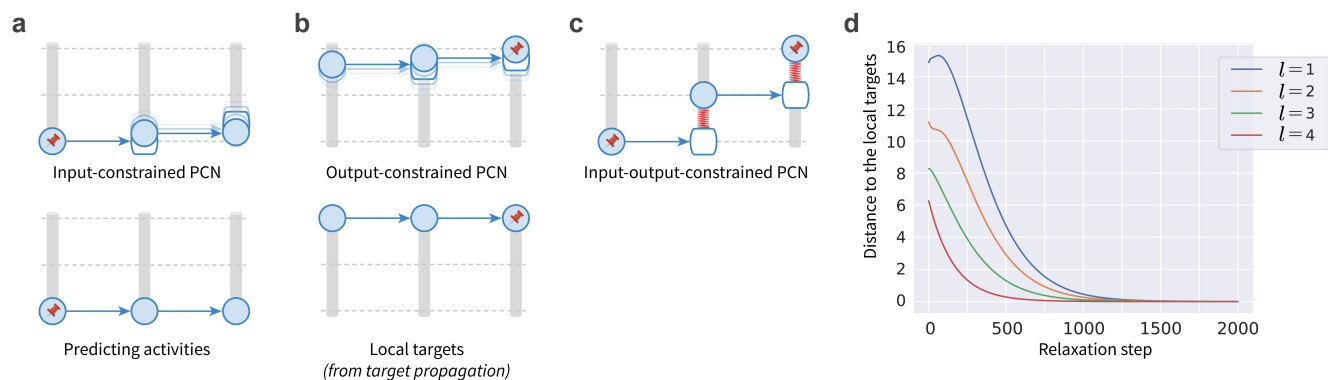

**Extended Data Fig. 2**

931 **Relationship of prospective configuration to target propagation.** Prospective configuration is related  
 932 to another influential algorithm of credit assignment — target propagation<sup>60</sup>. Since target propagation has  
 933 been closely linked to an efficient optimization method by Gauss-Newton<sup>105,106</sup>, this relationship further  
 934 provides another perspective on the advantages of prospective configuration. Target propagation is an  
 935 algorithm, which explicitly computes the neural activity in hidden layers required to produce the desired  
 936 target pattern. We call these values local targets. We demonstrate that one of energy-based networks,  
 937 predictive coding networks<sup>30,43,55</sup> (PCNs) tends to move the activity during relaxation towards these  
 938 local targets. This provides an additional intuition for why in the PCNs the neural activity converges to a  
 939 prospective state: These local targets correspond to a prospective state, because if they were produced, they  
 940 would predict the desired target pattern. The relationship of PCNs to target propagation can be visualized  
 941 with the proposed energy machine in Fig. 2, hence panels a–c illustrate how the neural activity in a PCN  
 942 depends on whether inputs and outputs are constrained, and these properties are formally proved in SI 2.4.

943 ▶ **a** | With only input neurons constrained (and outputs unconstrained) PCNs can generate prediction  
 944 about the output, and hence we refer to this pattern of neural activity as the predicting activity.

945 ▶ **b** | With only output neurons constrained (and inputs unconstrained), the neural activity of PCNs  
 946 relaxes to the local target from target propagation. This happens because with only outputs constrained,  
 947 other nodes have a freedom to move to values that generate the outputs, and when the energy reduces to 0  
 948 (as shown in the bottom display) all neurons must have the activity generating the target output.

949 ▶ **c** | With both input and output neurons constrained, the neural activity of PCNs relaxes to the  
 950 weighted sum of the local target from target propagation and the predicting activity. Note that the position  
 951 of the hidden node is in between the positions from panels a and b.

952 ▶ **d** | The distance between the neural activity to the local target at different layers along the relaxation  
 953 progress in output-constrained PCNs. Here, the neural activity of the output-constrained PCNs converges  
 954 to the local target, and the layers closer to the output layer (larger  $l$ ) converge to the local target earlier  
 955 than the others, which is as expected from the physical intuition of the energy machine.

956 **Implementation details.** We train the models to predict a target pattern from an input pattern (both  
 957 randomly generated from  $\mathcal{N}(0, 1)$ , and the input and target patterns are of 5 and 1 entries, respectively).  
 958 The structure of the networks is  $5 \rightarrow 5 \rightarrow 5 \rightarrow 5 \rightarrow 1$ . There is no activation function, i.e., it is a linear  
 959 network. For the computation of the local target in target propagation, refer to the original paper<sup>60</sup>. The  
 960 mean square difference is used to measure the distance to the local target.

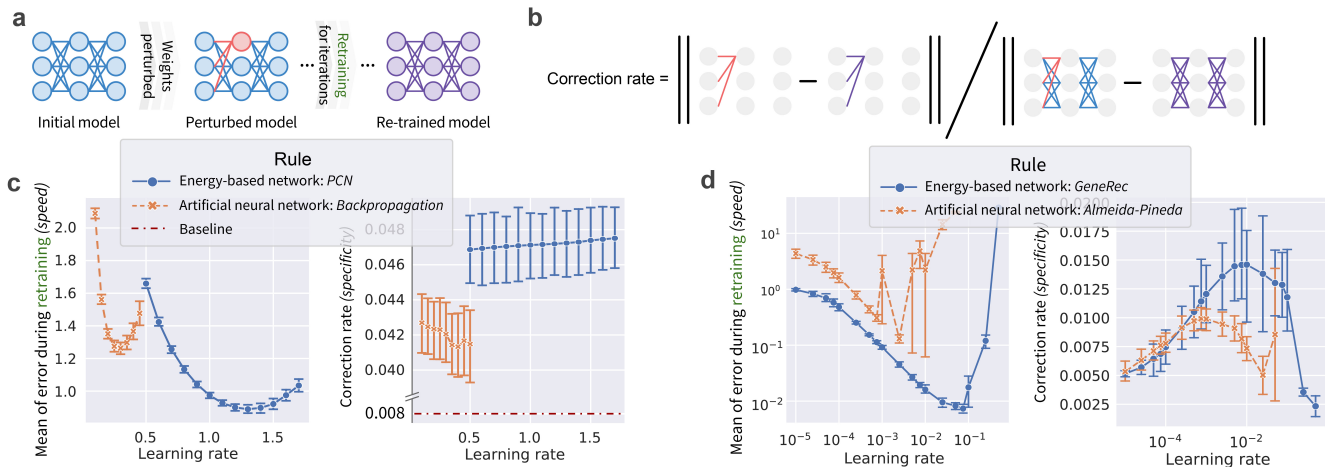

**Extended Data Fig. 3**

961 **Prospective configuration yields a more accurate weight modification.** A numerical experiment (panels a–b) verifies that *energy-based networks* (EBNs) yield a accurate weight modification than *artificial*  
 962 *neural networks* (ANNs) (panels c–d). The following intuition can be provided for why the prospective  
 963 configuration enables an accurate weight modification. In EBNs, if more error is assigned to a neuron, this  
 964 neuron will settle to a prospective activity that reduces the error. The prospective activity of this neuron is  
 965 then propagated through the network, resulting in less error being assigned to other neurons, thus the error  
 966 being assigned more accurately.  
 967

968 ▶ **a|** Experimental procedure: we take a pre-trained model (illustration here does not reflect the real  
 969 size of the model), randomly select a hidden neuron and perturb the synaptic weights connecting to this  
 970 neuron (red), then retrain this model on the same pattern for a fixed number of iterations. During retraining,  
 971 an optimal learning agent is expected to identify that the error in the output neurons is due to the perturbed  
 972 weights, thus, (1) correct the error faster, and (2) correct the perturbed weights more. We refer to the above  
 973 two properties as *speed* and *specificity*. Speed can be measured with the mean of error over retraining  
 974 iterations (the lower, the better).

975 ▶ **b|** Specificity can be measured by correction rate (the higher, the better): the ratio of how much the  
 976 perturbed weights are corrected compared to how much all the weights (in all layers) are corrected after  
 977 all retraining iterations.

978 ▶ **c|** A comparison between an EBN, predictive coding network<sup>30,43,55</sup> (PCN), and an ANN, trained  
 979 with backpropagation. In the right plot, there is an additional baseline, which is the number of perturbed  
 980 weights divided by the number of all the weights, indicating the expected correction rate if a learning rule  
 981 randomly assigns errors.

982 ▶ **d|** The same comparison as in panel c, but for another EBN, namely, *GeneRec*<sup>89</sup>. GeneRec describes  
 983 learning in recurrent networks, and ANN with this architecture is not trained by standard backpropagation,  
 984 but by a variant of backpropagation, called *Almeida-Pineda*<sup>90–92</sup>.

985 **Implementation details.** We first pre-train the models to predict a target pattern from an input pattern (both  
 986 randomly generated from  $\mathcal{N}(0, 1)$  and of 32 entries). The structure of the networks is  $32 \rightarrow 32 \rightarrow 32 \rightarrow 32$ .  
 987 The pre-training session is sufficiently long (1000 iterations) to reach convergence. Then, one neuron  
 988 is randomly selected from the  $(32 + 32)$  hidden neurons, and all weights connecting to this neuron are  
 989 “flipped” (i.e., multiplied by  $-1$ ). Current weights of the network are recorded as  $\mathbf{W}_b$ . The part of current  
 990 weights that were just flipped are recorded as  $\mathbf{W}_b^f$ . The network is then re-trained on the same pattern  
 991 for 64 iterations. After each re-training iteration, the model makes a prediction. The square difference

992 between the prediction and the target pattern is recorded as the “error during re-training” of this iteration.  
993 After the entire re-training session, the “errors during re-training” are averaged over the 64 re-training  
994 iterations, producing the left plots of panels c–d. Current weights of the network are recorded as  $\mathbf{W}_a$ . The  
995 part of current weights that were flipped before the re-training session are recorded as  $\mathbf{W}_a^f$ . The *correction*  
996 *rate* is computed as  $\| \mathbf{W}_a^f - \mathbf{W}_b^f \| / \| \mathbf{W}_a - \mathbf{W}_b \|$ , which produces the right plots of panels c–d. Each  
997 configuration was repeated 20 times, and the error bars represent standard error.

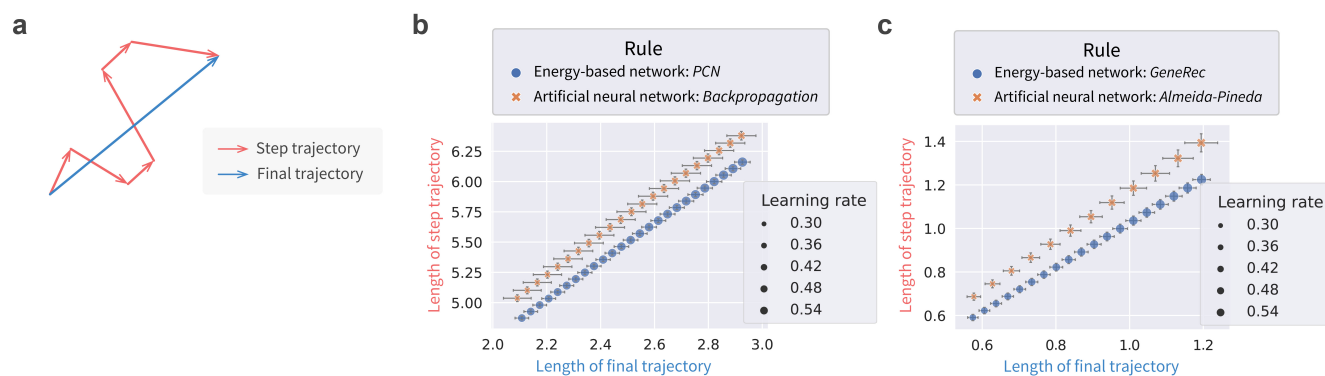

Extended Data Fig. 4

998 **Prospective configuration produces less erratic weight modification.** An experiment verifies that  
999 *energy-based networks* (EBNs) (i.e., prospective configuration), produce a less erratic weight modification  
1000 than *artificial neural networks* (ANNs) (i.e., backpropagation).

1001 ▶ **a** | Experimental procedure. The weights are updated for a fixed number of steps on a fixed number  
1002 of data points, which produces the step trajectory in the weight space (each red arrow corresponds to one  
1003 weights update). Connecting the start and end points of the step trajectory (i.e., the initial and final  
1004 weights of the model) produces the final trajectory (blue). A learning rule with less erratic weight  
1005 modification would produce a shorter step trajectory relative to the final trajectory. This property of less erratic  
1006 weight modification is also desirable for biological systems, because each weight modification costs metabolic  
1007 energy.

1008 ▶ **b** | Comparison of the length of step and final trajectories between EBN, predictive coding network  
1009 (PCN), and an ANN, trained with backpropagation. Note that the length of both trajectories depends on  
1010 the learning rate. Thus, in panels b–c, we present the length of the step and final trajectory on y and x axis,  
1011 respectively; each point is from a specific learning rate (represented by the size of the marker; the legend  
1012 does not enumerate all sizes). In such plots, when the two learning rules produce roughly the same length  
1013 of final trajectory (which could be from different learning rates), one can compare the length of their step  
1014 trajectory.

1015 ▶ **c** | The same comparison as in panel c, but for another EBN, namely, *GeneRec*<sup>89</sup>. *GeneRec* describes  
1016 learning in recurrent networks, and ANN with this architecture is not trained by standard backpropagation,  
1017 but by a variant of backpropagation, called *Almeida-Pineda*<sup>90–92</sup>.

1018 **Implementation details.** We train the models to predict a target pattern from an input pattern (both  
1019 randomly generated from  $\mathcal{N}(0, 1)$  and of 32 entries), and there are 32 pairs of them (32 datapoints). The  
1020 structure of the networks is  $32 \rightarrow 32 \rightarrow 32 \rightarrow 32$ . The batch size is one, as biological systems update  
1021 the weights after each experience. The training is conducted for 64 epochs (one epoch iterates over all  
1022 32 datapoints). At the end of each epoch, current weights of the network are recorded as one set. Thus,  
1023 it results in a sequence of 64 sets of weights. Each set of weights is used as one point to construct the  
1024 step trajectory. The first and last sets of weights are used to construct the final trajectory. The length of  
1025 the step and final trajectories can then be computed and reported in Extended Data Fig. 4b–c. For each  
1026 combination of learning rule and learning rate, simulation is repeated 20 times with different seeds, and  
1027 the error bars represent standard error.



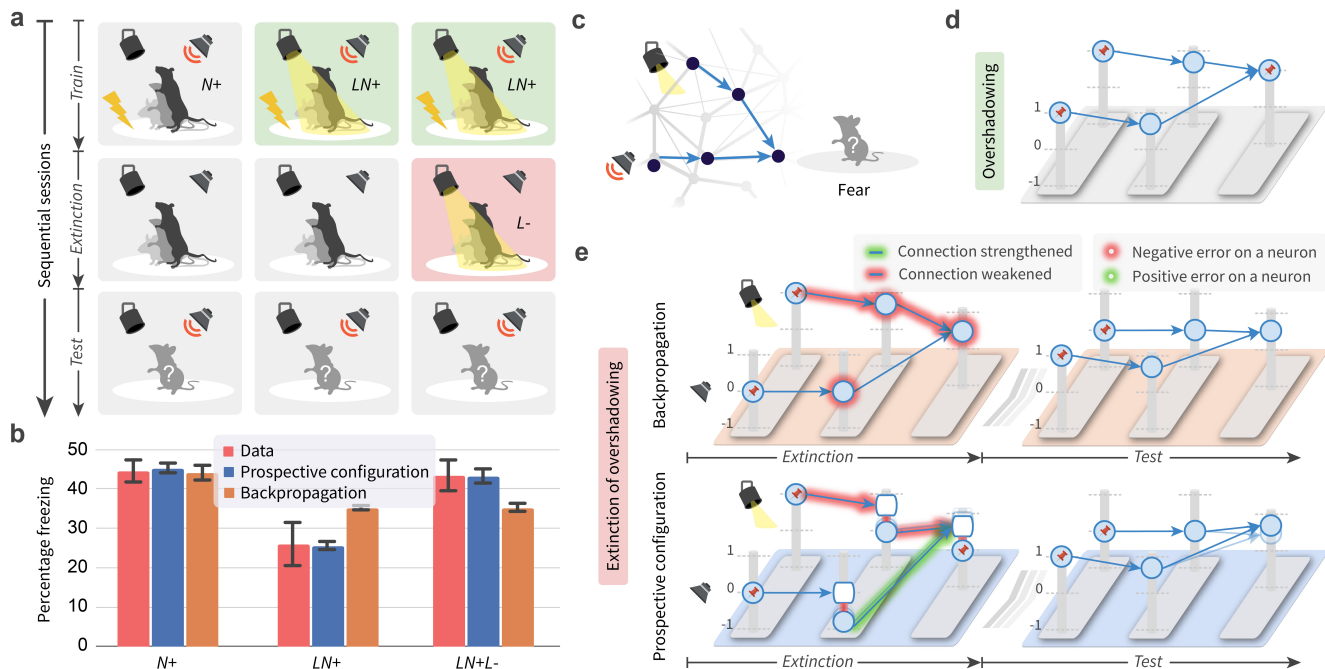

Extended Data Fig. 5

1028 **Prospective configuration explains extinction of overshadowing in fear conditioning (complete de-**  
 1029 **scription of the experiment in Fig. 6).** The extinction of overshadowing effect<sup>78</sup> can be accurately  
 1030 reproduced and explained by prospective configuration, but not backpropagation (comparing “Data”  
 1031 against “Prospective configuration” and “Backpropagation” in panel b).

1032 ▶ **a** | Experimental procedure. Rats were divided into three groups, corresponding to three columns.  
 1033 Each group underwent three sessions sequentially, corresponding to the top three rows, namely, train,  
 1034 extinction, and test. The goal of the training session was to associate fear (+) with different presented  
 1035 stimuli  $N$  or  $LN$  depending on the group: rats experienced an electric shock paired with different stimuli,  
 1036 where  $N$  and  $L$  stands for noise and light, respectively. Next, during the extinction session no shock was  
 1037 given, and for the third group the light was presented but without the shock, aiming to eliminate the fear  
 1038 (-) of light ( $L$ ). Finally, all groups underwent a test session measuring how much fear was associated with  
 1039 the noise: the noise was presented and the percentage of freezing of rats was measured.

1040 ▶ **b** | Experimental and simulation results. The bar chart plots the percentage of freezing during test for  
 1041 each group, both measured in the animal experiments<sup>78</sup> (i.e., Data) and simulated by the two learning rules.  
 1042 Two effects are present in experimental data. First, comparing the groups  $N+$  and  $LN+$  demonstrates the  
 1043 overshadowing effect: there is less fear of noise if the noise had been compounded with light when paired  
 1044 with shock  $LN+$  than if the noise alone had been paired with shock  $N+$  (that is, light overshadows noise in  
 1045 a conditioned fear experiment). This effect can be accounted for by the canonical model of error-driven  
 1046 learning — the Rescorla-Wagner model<sup>83</sup>, and consequently it can be also produced by both error-driven  
 1047 models we consider — backpropagation and prospective configuration (explained in panel d). Second,  
 1048 comparing the groups  $LN+$  and  $LN+L-$  shows the striking effect of extinction of overshadowing: presenting  
 1049 the light without the shock increases the fear response to the non-presented stimulus — noise. This effect  
 1050 is not produced by backpropagation, but can be reproduced by prospective configuration (explained in  
 1051 panel e).

1052 ▶ **c** | The neural architecture considered: both stimuli are processed by hidden neurons (i.e., intermedi-  
 1053 ate neurons corresponding to visual and auditory cortices) and are then combined to produce the prediction

1054 of electric shock (i.e., fear).

1055 ▶ **d** | Explanation of overshadowing effect, i.e., the reduced percentage freezing comparing group  
1056  $LN+$  against  $N+$ . With the energy machine introduced in Fig. 2, the diagram illustrates the state of the  
1057 network after the *Train* sessions in groups  $LN+$  and  $LN+L-$ . The network learns to predict a shock (i.e.  
1058 produces output of 1), on the basis of two stimuli, hence each of the inputs to the output neuron must be  
1059 0.5. Therefore, if only one stimulus is presented, the output of the network is reduced to 0.5. The network  
1060 shown in this panel is acting as the starting point of learning in panel e.

1061 ▶ **e** | Explanation of extinction of overshadowing effect, i.e., the increased percentage freezing after  
1062 noise in group  $LN+L-$  in comparison to  $LN+$ . This effect suggests that during extinction trials, where  
1063 light is presented without a shock, the animals increased fear prediction to noise. As shown in this  
1064 panel, backpropagation (top) cannot explain this, since the error cannot be backpropagated to and drive a  
1065 weight modification on a non-activated branch where no stimuli are presented; prospective configuration  
1066 (bottom), however, can account for this. Specifically, on the non-activated branch, the hidden neural  
1067 activity decreases from zero to a small negative value (it may correspond to a neural activity decreasing  
1068 below the baseline<sup>10</sup>). Since a weight modification depends on the product of the presynaptic activity  
1069 and the postsynaptic activity representing the error, which are both negative here, the weight on the  
1070 non-activated branch is strengthened.

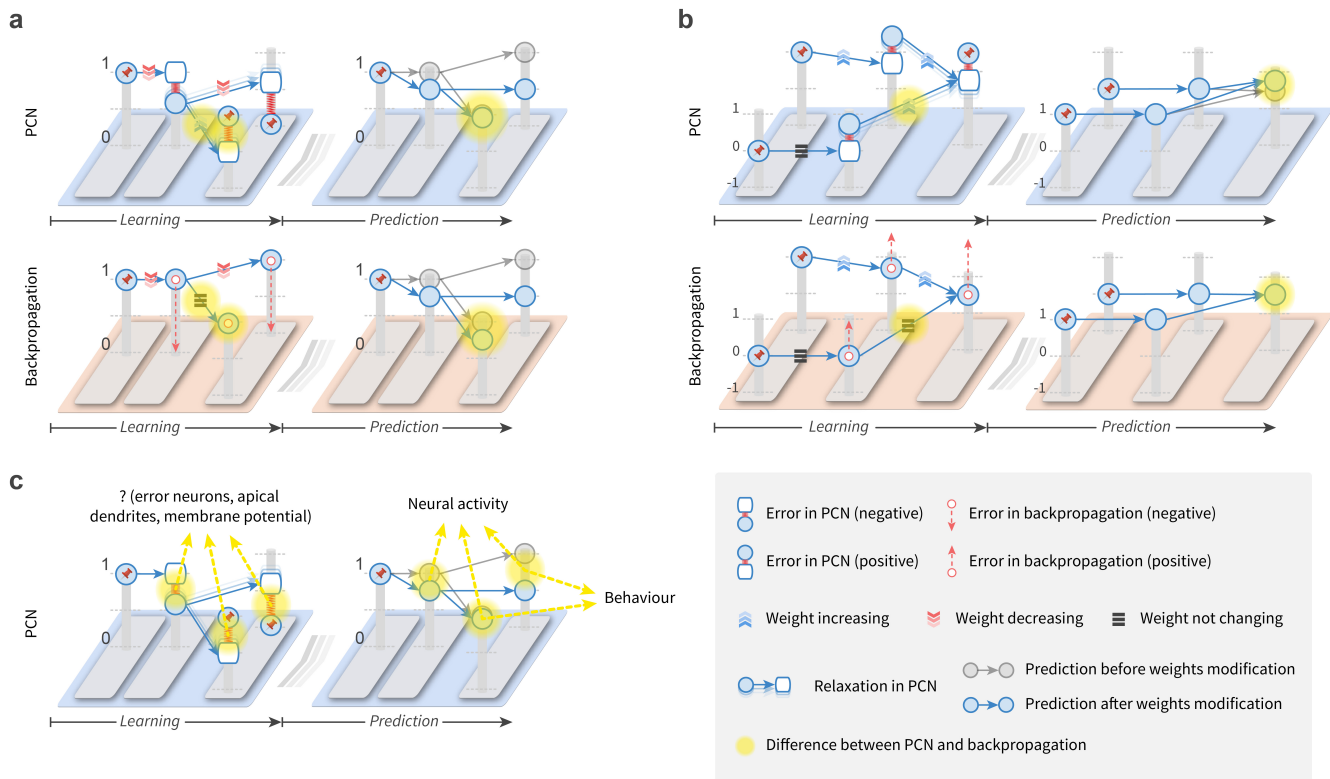

**Extended Data Fig. 6**

1071 **Experimental predictions of prospective configuration and backpropagation.** To provide examples  
 1072 of experimental predictions of prospective configuration, panels a-b (and Extended Data Fig. 7) highlight  
 1073 the different behaviour of the learning rules in simple network motifs, which are minimal networks  
 1074 displaying given behaviour. Two motifs in this figure have been already analysed earlier in the paper, but  
 1075 there we focused on differences corresponding to experimentally observed effects, while in this figure  
 1076 we also highlight other qualitative differences that reveal a range of untested predictions of prospective  
 1077 configuration. Here, we consider *predictive coding network*<sup>30,43,55</sup> (PCN) with the energy machine in  
 1078 Fig. 2, however, a similar analysis can be applied to other energy-based networks, which also follow the  
 1079 principle of prospective configuration. In each panel, the top and bottom rows demonstrate the prediction  
 1080 of PCNs and backpropagation, respectively. The left column highlights the differences in the prediction  
 1081 errors during learning and the resulting weight update. The right column demonstrates the neuron activity  
 1082 before (transparent) and after (opaque) weight update. The differences between the rules are highlighted  
 1083 in yellow. Experimental predictions following from them can be derived as summarized in panel c.

1084 ▶ **a** | The error may spread to the branch where the prediction is correctly made. This motif has been  
 1085 compared with experimental data in Fig. 7, but here we focus on the effect illustrated in Fig. 1 and Fig. 2d,  
 1086 which despite being intuitive, has not been tested experimentally to our knowledge. The panel highlights  
 1087 that an error on one output in PCN results in prediction error on the other, correctly predicted output. This  
 1088 produces an increase of the weight of the correct output neuron, which compensates for the decrease of  
 1089 the weight from the input, and enables the network to make correct prediction on the next trial.

1090 ▶ **b** | The error may cause a weight change in the sensory regions associated with absent stimuli.  
 1091 The panel shows a similar motif as the one investigated in Extended Data Fig. 5. The difference is that  
 1092 Extended Data Fig. 5 introduces negative error while this panel introduces positive error on the same  
 1093 architecture. Interestingly, introducing negative (Extended Data Fig. 5) or positive (this panel) error to the

1094 same architecture produce a similar effect in the PCN, i.e. an increased predicted output for the stimulus  
1095 not presented during learning.

1096 ► **c** | Observing model behaviour in experiments. The diagram summarizes how the differences  
1097 highlighted in previous panels could be measured in experiments. The key difference in models' behaviour  
1098 during learning is the difference in error signals. However, currently it is not clear how the prediction errors  
1099 are represented in the cortical circuits. Three hypotheses have been proposed in the literature that errors  
1100 are encoded in: activity of separate error neurons<sup>43,107,108</sup>, membrane potential of value neurons<sup>109,110</sup>,  
1101 membrane potential in apical dendrites of value neurons<sup>3,27</sup>. Nevertheless, if the future research establishes  
1102 how errors are encoded, it will be possible to test the predictions related to errors during learning. For  
1103 example, one can design a task corresponding to panel a, where predictions in two modalities have to be  
1104 made on the basis of a stimulus. One can then test if omission in one modality results in error signals in  
1105 the brain region corresponding to the correctly predicted modality. The models also differ in the neural  
1106 activity of the value nodes during the next trial following the learning. Such predictions are easier to  
1107 test, because if the model makes a prediction without observing any supervised signal, then all errors are  
1108 equal to 0 in PCNs, so the neural activity should reflect just the activity of value nodes. Additionally,  
1109 the differences in the activity of the output value neurons should be testable in behavioural experiments.  
1110 For example, panel b makes a behavioural prediction (presenting light with stronger shock should also  
1111 increase freezing for tone) that can be tested in a similar way as described in Extended Data Fig. 5. Testing  
1112 this prediction would also validate our explanation of the experimental result in Extended Data Fig. 5.

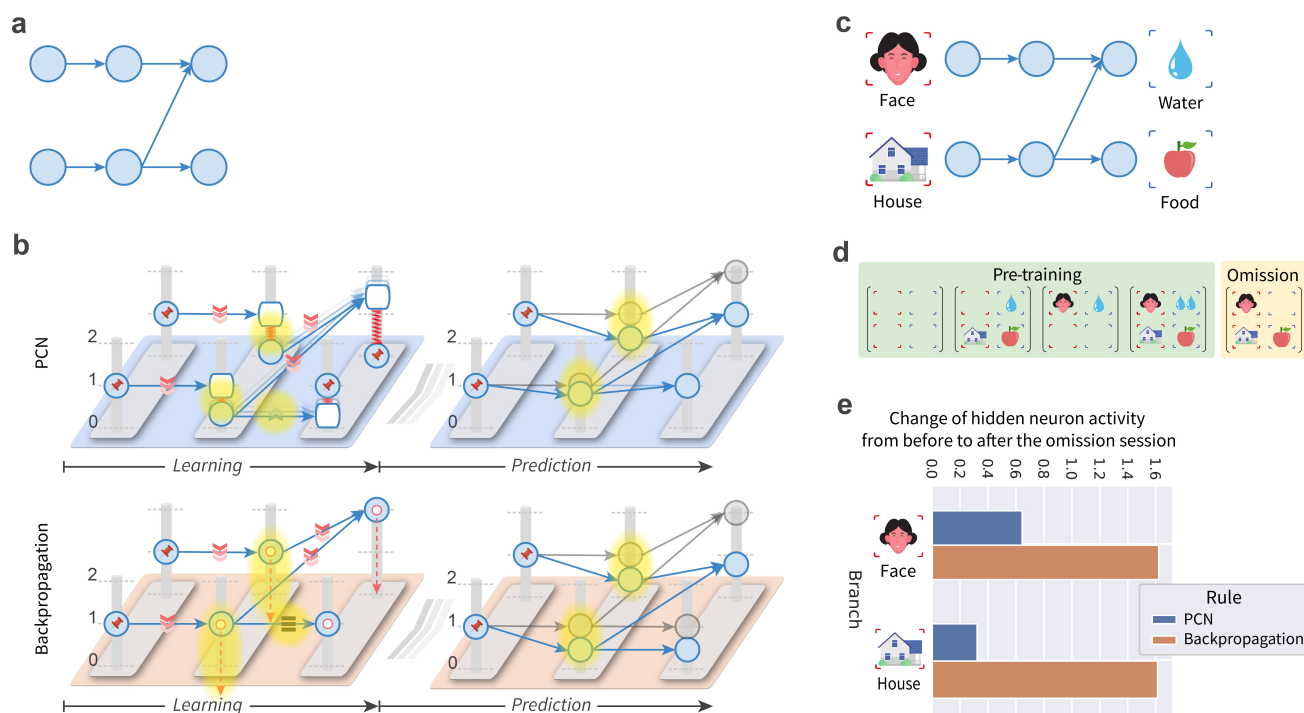

**Extended Data Fig. 7**

1113 **Experimental predictions concerning errors assigned to hidden nodes.** The figure demonstrates a  
 1114 striking difference in how prospective configuration and backpropagation assign error to hidden nodes.  
 1115 Namely, in prospective configuration, the error assigned to a hidden node is reduced if the node is also  
 1116 connected to correctly predicted outputs. This difference is illustrated in a motif (panel a), for which we  
 1117 illustrate behaviour of learning rules with the energy machine (panel b), and describe a sample experiment  
 1118 testing model predictions (panels c–d). Finally, we report the simulation results of the two learning rules  
 1119 (panel e), confirming that they indeed make distinct predictions for this motif.

1120 ▶ **a**| In this motif, two stimuli are presented and two predictions are made. One stimulus contributes  
 1121 to only one prediction, while the other stimulus contributes to both predictions.

1122 ▶ **b**| Comparison of learning rules' behaviour with the energy machine (notation as in Extended Data  
 1123 Fig. 6). The diagrams illustrate a network containing the motif (panel a), in a situations where one of the  
 1124 predicted outputs (top output) is omitted. A negative error is introduced to the prediction determined by  
 1125 both stimuli. Thus, we would expect the error to be assigned to hidden neurons on both branches. Both  
 1126 learning rules do so, however, they assign errors differently. PCNs allocate less error on the bottom hidden  
 1127 neuron than the top hidden neuron, because the bottom hidden neuron also contributes to another output  
 1128 that was correctly predicted, while backpropagation assigns the same error to both hidden neurons. This is  
 1129 also a nice example where prospective configuration (PCNs) demonstrates more intelligent behavior.

1130 ▶ **c**| Experimental stimuli. To test this motif, it is important to choose stimuli for which neural activity  
 1131 of “hidden” neurons can be easily measured. In case of a human experiment, inputs could contain faces  
 1132 and houses, because the hidden neurons would correspond to the brain regions known to be specifically  
 1133 excited by these particular types of stimuli, and the activity of these regions could be easily distinguished  
 1134 in an experiment<sup>111</sup>. The outputs could correspond to reward modalities (e.g. water and food). In case of a  
 1135 human experiment, these could be “virtual rewards” the participants are instructed to gather, while for  
 1136 animals, these could be the actual rewards.

1137 ▶ **d**| Experimental procedure. The motif shown in panel c could arise in brain networks from training



1138 with examples shown in the green box. To test differences in behaviour of learning rules, partial omission  
1139 trials could be presented, in which one of the expected outputs is omitted, as shown in the orange box.

1140 ▶ **e** | Results of simulations. We pre-train the models with the examples in the green box in panel d for  
1141 a sufficient number of iterations until convergence, and then we train the model with the omission using  
1142 the example in the orange box in panel d for one trial. We measure the change of hidden neural activity on  
1143 both branches from before to after the above omission session. The graph shows simulation results of such  
1144 change in hidden activity: PCNs predict different changes on different branches, while backpropagation  
1145 predicts the same change on different branches (consistent with illustration in panel b, right).

1146 **Implementation details.** Presenting and not presenting a stimulus (face, house, water, or food) are  
1147 encoded as 1 and 0, respectively. Presenting two drops of water is encoded as 2. The network is initialized  
1148 to the pre-trained connection pattern demonstrated in Extended Data Fig. 7c, i.e., the weights visible  
1149 on the panel are set to one and other weights are set to zero. Such pattern of weights would arise from  
1150 pre-training with the four examples in Extended Data Fig. 7d (in the green “Pre-training” box), but for  
1151 simplicity, we do not simulate such pre-training but just set the weights as explained before. Next, to  
1152 measure the activity of hidden units of such network during prediction, we set both inputs to 1 and record  
1153 the hidden neural activity of the two branches. Subsequently, the model is presented with the omission  
1154 trial shown in the orange box and the weights are updated once. Finally, to measure weight changes  
1155 resulting from training on the subsequent prediction trial, we set both inputs to 1 and record the hidden  
1156 neural activity of the two branches for the second time. The change of the hidden neuron activity from  
1157 before to after the omission session can thus be computed for both branches.

## 1158 2 Supplementary Information

1159 In this supplement, we present additional description and analysis of the simulated models. The first  
1160 part provides details of all models simulated in the paper. The second part analyses target alignment and  
1161 the third part - prospective index of PCNs. The fourth part discusses relationship between prospective  
1162 configuration and target propagation.

### 1163 2.1 Details of simulated models

1164 This section gives more details of all simulated models. The general idea of *energy-based networks* (EBNs)  
1165 and *artificial neural networks* (ANNs), and one of EBNs, *predictive coding network*<sup>30,43,55</sup> (PCN), have  
1166 been described in the Main text and Methods. PCN is again included here along with other simulated  
1167 models to provide descriptions in a unified form, facilitating the reproduction of our reported results.  
1168 Complete code and full documentation reproducing all simulation results will be made publicly available  
1169 at <https://github.com/YuhangSong/A-New-Perspective> upon publication of this work.

1170 Algorithms 2 to 7 describe how the four models simulated in this paper predict and learn. These  
1171 four models are: PCN, backpropagation, *GeneRec*<sup>89</sup>, and *Almeida-Pineda*<sup>90-92</sup>. Among the four models,  
1172 PCN and GeneRec are the two EBNs we investigate; backpropagation and Almeida-Pineda are the two  
1173 ANNs we investigate. Specifically, PCN is compared against backpropagation, because it has been  
1174 established that PCN are closely related to backpropagation<sup>30,37</sup> and they make the same prediction with  
1175 the same weights and input pattern<sup>30</sup>. Therefore we simulated prediction in these two algorithms in the  
1176 same way (Algorithm 2). However, they learn differently (c.f. Algorithms 3 and 4). The other EBN,  
1177 GeneRec, describes learning in recurrent networks, and ANN in this architecture is not trained by standard  
1178 backpropagation, but a modified version proposed by Almeida and Pineda<sup>90-92</sup> (thus called the *Almeida-*  
1179 *Pineda* algorithm). Thus, GeneRec should be compared against Almeida-Pineda because they make same  
1180 prediction with the same weights and input pattern<sup>89</sup>. Therefore we simulated prediction in these two  
1181 algorithms in the same way (Algorithm 5). But they learn differently (c.f. Algorithms 6 and 7). In a  
1182 word, PCN and backpropagation are EBN and ANN working in feed-forward architecture, respectively;  
1183 GeneRec and Almeida-Pineda are EBN and ANN working in recurrent architecture, respectively.

---

**Algorithm 2:** Predict with backpropagation or *predictive coding network*<sup>30,43,55</sup> (PCN)

---

**Input:** input pattern  $\mathbf{s}^{\text{in}}$ ; synaptic weights  $\{\mathbf{w}^1, \mathbf{w}^2, \dots, \mathbf{w}^L\}$

**Result:** activity of output neurons  $\mathbf{x}^{L+1}$

```
1  $\mathbf{x}^1 = \mathbf{s}^{\text{in}}$ ; // Clamp input neurons to input pattern
2 for  $l = 1; l < L + 1; l = l + 1$  do // Forward pass of the network
3 |  $\mathbf{x}^{l+1} = \mathbf{w}^l f(\mathbf{x}^l)$ ;
4 end
```

---

1184  
1185 Particularly, PCN & Backpropagation work in a network where prediction is made from the input  
1186 through a series of forward weights  $\{\mathbf{w}^1, \mathbf{w}^2, \dots, \mathbf{w}^L\}$ ; GeneRec & Almeida-Pineda works in a net-  
1187 work where prediction is made from input through a mixture of forward weights  $\{\mathbf{w}^1, \mathbf{w}^2, \dots, \mathbf{w}^L\}$  and  
1188 backward weights  $\{\mathbf{m}^1, \mathbf{m}^2, \dots, \mathbf{m}^L\}$ . The forward weights  $\{\mathbf{w}^1, \mathbf{w}^2, \dots, \mathbf{w}^L\}$  and backward weights  
1189  $\{\mathbf{m}^1, \mathbf{m}^2, \dots, \mathbf{m}^L\}$  are not necessarily related. This architecture is also similar to the continuous Hopfield  
1190 model<sup>112,113</sup>. Unlike in some previous studies<sup>29</sup>, here, we focus on layered networks, where the sets of  
1191 neurons at adjacent layers  $\mathbf{x}^l$  and  $\mathbf{x}^{l+1}$  are connected by synaptic weights. Thus, we define two sets of  
1192 weights for GeneRec & Almeida-Pineda that works in the recurrent network:  $\mathbf{w}^l$  is the forward weights  
1193 connecting from  $\mathbf{x}^l$  to  $\mathbf{x}^{l+1}$ ;  $\mathbf{m}^l$  is the backward weights connecting from  $\mathbf{x}^{l+1}$  to  $\mathbf{x}^l$ .

---

**Algorithm 3:** Learn with backpropagation

---

**Input:** input pattern  $\mathbf{s}^{\text{in}}$ ; target pattern  $\mathbf{s}^{\text{target}}$ ; synaptic weights  $\{\mathbf{w}^1, \mathbf{w}^2, \dots, \mathbf{w}^L\}$   
**Output:** updated synaptic weights  $\{\mathbf{w}^1, \mathbf{w}^2, \dots, \mathbf{w}^L\}$

```

1  $\mathbf{x}^1 = \mathbf{s}^{\text{in}}$ ; // Clamp input neurons to input pattern
2 for  $l = 1; l < L + 1; l = l + 1$  do // Forward pass of the network
3    $\mathbf{x}^{l+1} = \mathbf{w}^l f(\mathbf{x}^l)$ ;
4 end
5  $\boldsymbol{\varepsilon}^{L+1} = \mathbf{s}^{\text{target}} - \mathbf{x}^{L+1}$ ; // Compute error of the output neurons
6 for  $l = L + 1; l > 2; l = l - 1$  do // Backpropagation of error
7    $\boldsymbol{\varepsilon}^{l-1} = f'(\mathbf{x}^{l-1}) \circ ((\mathbf{w}^{l-1})^T \boldsymbol{\varepsilon}^l)$ ;
8 end
9 for  $l = 1; l < L + 1; l = l + 1$  do // Update weights
10   $\Delta \mathbf{w}^l = \alpha \boldsymbol{\varepsilon}^{l+1} (f(\mathbf{x}^l))^T$ ;
11   $\mathbf{w}^l = \mathbf{w}^l + \Delta \mathbf{w}^l$ ;
12 end

```

---

1194

1195 Also note that GeneRec has been explored and re-discovered in recent works<sup>50,114</sup> showing how a  
1196 closely related algorithm resembles backpropagation when the backward weights are the transposes of the  
1197 forward weights  $\mathbf{m}^l = (\mathbf{w}^l)^T$  (or for a fully-connected network in their context  $w_{i,j} = w_{j,i}$ ), and how the  
1198 extreme version of the algorithm approximate backpropagation<sup>29</sup>.

1199 Some common notations in the algorithms are:  $\alpha$  is the learning rate for weights update;  $\gamma$  and  $\mathcal{T}$  are  
1200 the integration step and length of relaxation, respectively (specified to the two EBNs, PCN and GeneRec);  
1201  $\mathbf{s}^{\text{in}}$  and  $\mathbf{s}^{\text{target}}$  are the input and target patterns, respectively. For Almeida-Pineda, which requires additional  
1202 iterative process to propagate error,  $\beta$  and  $\mathcal{K}$  are the integration step and length of this iterative process,  
1203 respectively. In our simulation, we use  $\beta = 0.01$  and  $\mathcal{K} = 1600$ .

1204 All simulated models work in mini-batch mode, that is to say, one iteration is to update the weights for  
1205 one step on a mini-batch of data randomly sampled from the training set for classification tasks. The above  
1206 sampling is without replacement, i.e., the same examples will not be sampled again before the completion  
1207 of a epoch, which is when the entire training set has been sampled once. For example, considering a  
1208 dataset of 1000 examples with a batch-size (number of examples in a mini-batch) of 10, then each iteration  
1209 would update weights for one step on 10 examples, and it will take 100 such iterations to complete one  
1210 epoch. To implement the Algorithms 2 to 7 described below in mini-batch mode, one can simply add an  
1211 extra-dimension, the size of which is batch-size, to all the neuron-specific vectors in the algorithms such  
1212 as  $\mathbf{x}^l$ ,  $\boldsymbol{\varepsilon}^l$  and etc., and then reduce this dimension by summing over it when computing weight update  $\Delta \mathbf{w}^l$   
1213 (and  $\Delta \mathbf{m}^l$  if the model is GeneRec or Almeida-Pineda).

1214 Note that learning with Almeida-Pineda involves relaxation of the model, i.e., updating neural activity,  
1215 in lines 5-12 of Algorithm 6. However, its function is to make a prediction with current weights and input  
1216 pattern so that the error on the output neurons can be computed (in the following line 13), similar as the  
1217 function of “forward pass” in backpropagation in lines 2-4 of Algorithm 3. The neural activity in the  
1218 Almeida-Pineda model is fixed during spreading of error, like in backpropagation. Thus, Almeida-Pineda  
1219 is classified as an ANN rather than an EBN (which updates neural activity during spreading of error).

---

**Algorithm 4:** Learn with *predictive coding network*<sup>30,43,55</sup> (PCN)

---

**Input:** input pattern  $\mathbf{s}^{\text{in}}$ ; target pattern  $\mathbf{s}^{\text{target}}$ ; synaptic weights  $\{\mathbf{w}^1, \mathbf{w}^2, \dots, \mathbf{w}^L\}$   
**Output:** updated synaptic weights  $\{\mathbf{w}^1, \mathbf{w}^2, \dots, \mathbf{w}^L\}$

```

1  $\mathbf{x}^1 = \mathbf{s}^{\text{in}}$ ; // Clamp input neurons to input pattern
2  $\mathbf{x}^{L+1} = \mathbf{s}^{\text{target}}$ ; // Clamp output neurons to target pattern
3 for  $l = 2; l < L + 1; l = l + 1$  do // Initialize  $\mathbf{x}$ 
4 |  $\mathbf{x}^l = \mathbf{0}$ ;
5 end
6 for  $t = 0; t < \mathcal{T}; t = t + 1$  do // Relaxation
7 | for  $l = 1; l < L + 1; l = l + 1$  do
8 | |  $\hat{\mathbf{x}}^{l+1} = \mathbf{w}^l f(\mathbf{x}^l)$ ;
9 | |  $\boldsymbol{\varepsilon}^{l+1} = \mathbf{x}^{l+1} - \hat{\mathbf{x}}^{l+1}$ ;
10 | end
11 | for  $l = 2; l < L + 1; l = l + 1$  do
12 | |  $\Delta \mathbf{x}^l = \gamma \left( -\boldsymbol{\varepsilon}^l + f'(\mathbf{x}^l) \circ \left( (\mathbf{w}^l)^T \boldsymbol{\varepsilon}^{l+1} \right) \right)$ ;
13 | |  $\mathbf{x}^l = \mathbf{x}^l + \Delta \mathbf{x}^l$ ;
14 | end
15 end
16 for  $l = 1; l < L + 1; l = l + 1$  do // Update weights
17 |  $\Delta \mathbf{w}^l = \alpha \boldsymbol{\varepsilon}^{l+1} (f(\mathbf{x}^l))^T$ ;
18 |  $\mathbf{w}^l = \mathbf{w}^l + \Delta \mathbf{w}^l$ ;
19 end

```

---

1220

---

**Algorithm 5:** Predict with *Almeida-Pineda*<sup>90-92</sup> or *GeneRec*<sup>89</sup>

---

**Input:** input pattern  $\mathbf{s}^{\text{in}}$ ; forward and backward synaptic weights  $\{\mathbf{w}^1, \mathbf{w}^2, \dots, \mathbf{w}^L\}$  and  $\{\mathbf{m}^1, \mathbf{m}^2, \dots, \mathbf{m}^L\}$   
**Result:** activity of output neurons  $\mathbf{x}^{L+1}$

```

1  $\mathbf{x}^1 = \mathbf{s}^{\text{in}}$ ; // Clamp input neurons to input pattern
2 for  $l = 2; l < L + 2; l = l + 1$  do // Initialize  $\mathbf{x}$ 
3 |  $\mathbf{x}^l = \mathbf{0}$ ;
4 end
5 for  $t = 0; t < \mathcal{T}; t = t + 1$  do // Relaxation
6 | for  $l = 2; l < L + 1; l = l + 1$  do
7 | |  $\Delta \mathbf{x}^l = \gamma \left( -\mathbf{x}^l + \mathbf{m}^l f'(\mathbf{x}^{l+1}) + \mathbf{w}^{l-1} f'(\mathbf{x}^{l-1}) \right)$ ;
8 | |  $\mathbf{x}^l = \mathbf{x}^l + \Delta \mathbf{x}^l$ ;
9 | end
10 |  $\Delta \mathbf{x}^{L+1} = \gamma \left( -\mathbf{x}^{L+1} + \mathbf{w}^L f'(\mathbf{x}^L) \right)$ ;
11 |  $\mathbf{x}^{L+1} = \mathbf{x}^{L+1} + \Delta \mathbf{x}^{L+1}$ ;
12 end

```

---

1221

---

**Algorithm 6:** Learn with *Almeida-Pineda*<sup>90–92</sup>

---

**Input:** input pattern  $\mathbf{s}^{\text{in}}$ ; target pattern  $\mathbf{s}^{\text{target}}$ ; forward and backward synaptic weights  $\{\mathbf{w}^1, \mathbf{w}^2, \dots, \mathbf{w}^L\}$  and  $\{\mathbf{m}^1, \mathbf{m}^2, \dots, \mathbf{m}^L\}$

**Output:** updated forward and backward synaptic weights  $\{\mathbf{w}^1, \mathbf{w}^2, \dots, \mathbf{w}^L\}$  and  $\{\mathbf{m}^1, \mathbf{m}^2, \dots, \mathbf{m}^L\}$

```

1  $\mathbf{x}^1 = \mathbf{s}^{\text{in}}$ ; // Clamp input neurons to input pattern
2 for  $l = 2; l < L + 2; l = l + 1$  do // Initialize  $\mathbf{x}$ 
3 |  $\mathbf{x}^l = \mathbf{0}$ ;
4 end
5 for  $t = 0; t < \mathcal{T}; t = t + 1$  do // Relaxation
6 | for  $l = 2; l < L + 1; l = l + 1$  do
7 | |  $\Delta \mathbf{x}^l = \gamma(-\mathbf{x}^l + \mathbf{m}^l f'(\mathbf{x}^{l+1}) + \mathbf{w}^{l-1} f'(\mathbf{x}^{l-1}))$ ;
8 | |  $\mathbf{x}^l = \mathbf{x}^l + \Delta \mathbf{x}^l$ ;
9 | end
10 |  $\Delta \mathbf{x}^{L+1} = \gamma(-\mathbf{x}^{L+1} + \mathbf{w}^L f'(\mathbf{x}^L))$ ;
11 |  $\mathbf{x}^{L+1} = \mathbf{x}^{L+1} + \Delta \mathbf{x}^{L+1}$ ;
12 end
13  $\boldsymbol{\varepsilon}^{L+1} = \mathbf{s}^{\text{target}} - \mathbf{x}^{L+1}$ ; // Compute error of the output neurons
14 for  $l = 1; l < L + 1; l = l + 1$  do // Initialize  $\boldsymbol{\varepsilon}$ 
15 |  $\boldsymbol{\varepsilon}^l = \mathbf{0}$ ;
16 end
17 for  $t = 1; t < \mathcal{K} + 1; t = t + 1$  do // Backpropagation of error
18 | for  $l = 2; l < L + 1; l = l + 1$  do
19 | |  $\Delta \boldsymbol{\varepsilon}^l = \beta(-\boldsymbol{\varepsilon}^l + f'(\mathbf{x}^l) \circ (\mathbf{m}^l \boldsymbol{\varepsilon}^{l+1}) + f'(\mathbf{x}^l) \circ (\mathbf{w}^{l-1} \boldsymbol{\varepsilon}^{l-1}))$ ;
20 | |  $\boldsymbol{\varepsilon}^l = \boldsymbol{\varepsilon}^l + \Delta \boldsymbol{\varepsilon}^l$ ;
21 | end
22 |  $\Delta \boldsymbol{\varepsilon}^1 = \beta(-\boldsymbol{\varepsilon}^1 + f'(\mathbf{x}^1) \circ (\mathbf{m}^1 \boldsymbol{\varepsilon}^2))$ ;
23 |  $\boldsymbol{\varepsilon}^1 = \boldsymbol{\varepsilon}^1 + \Delta \boldsymbol{\varepsilon}^1$ ;
24 end
25 for  $l = 1; l < L + 1; l = l + 1$  do // Update weights
26 |  $\Delta \mathbf{w}^l = \alpha \boldsymbol{\varepsilon}^{l+1} (f(\mathbf{x}^l))^T$ ;
27 |  $\mathbf{w}^l = \mathbf{w}^l + \Delta \mathbf{w}^l$ ;
28 |  $\Delta \mathbf{m}^l = \alpha \boldsymbol{\varepsilon}^l (f(\mathbf{x}^{l+1}))^T$ ;
29 |  $\mathbf{m}^l = \mathbf{m}^l + \Delta \mathbf{m}^l$ ;
30 end

```

---



---

**Algorithm 7: Learn with *GeneRec***<sup>89</sup>

---

**Input:** input pattern  $\mathbf{s}^{\text{in}}$ ; target pattern  $\mathbf{s}^{\text{target}}$ ; forward and backward synaptic weights  $\{\mathbf{w}^1, \mathbf{w}^2, \dots, \mathbf{w}^L\}$  and  $\{\mathbf{m}^1, \mathbf{m}^2, \dots, \mathbf{m}^L\}$

**Output:** updated forward and backward synaptic weights  $\{\mathbf{w}^1, \mathbf{w}^2, \dots, \mathbf{w}^L\}$  and  $\{\mathbf{m}^1, \mathbf{m}^2, \dots, \mathbf{m}^L\}$

```

1  $\mathbf{x}^1 = \mathbf{s}^{\text{in}}$ ; // Clamp input neurons to input pattern
2 for  $l = 2; l < L + 2; l = l + 1$  do // Initialize  $\mathbf{x}$ 
3 |  $\mathbf{x}^l = \mathbf{0}$ ;
4 end
5 for  $t = 0; t < \mathcal{T}; t = t + 1$  do // Relaxation
6 | for  $l = 2; l < L + 1; l = l + 1$  do
7 | |  $\Delta \mathbf{x}^l = \gamma(-\mathbf{x}^l + \mathbf{m}^l f'(\mathbf{x}^{l+1}) + \mathbf{w}^{l-1} f'(\mathbf{x}^{l-1}))$ ;
8 | |  $\mathbf{x}^l = \mathbf{x}^l + \Delta \mathbf{x}^l$ ;
9 | end
10 |  $\Delta \mathbf{x}^{L+1} = \gamma(-\mathbf{x}^{L+1} + \mathbf{w}^L f'(\mathbf{x}^L))$ ;
11 |  $\mathbf{x}^{L+1} = \mathbf{x}^{L+1} + \Delta \mathbf{x}^{L+1}$ ;
12 end
13 for  $l = 1; l < L + 1; l = l + 1$  do // Update weights (negative phase)
14 |  $\Delta \mathbf{w}^l = -\alpha f(\mathbf{x}^{l+1}) (f(\mathbf{x}^l))^T$ ;
15 |  $\mathbf{w}^l = \mathbf{w}^l + \Delta \mathbf{w}^l$ ;
16 |  $\Delta \mathbf{m}^l = -\alpha f(\mathbf{x}^l) (f(\mathbf{x}^{l+1}))^T$ ;
17 |  $\mathbf{m}^l = \mathbf{m}^l + \Delta \mathbf{m}^l$ ;
18 end
19  $\mathbf{x}^{L+1} = \mathbf{s}^{\text{target}}$ ; // Clamp output neurons to target pattern
20 for  $t = 0; t < \mathcal{T}; t = t + 1$  do // Relaxation
21 | for  $l = 2; l < L + 1; l = l + 1$  do
22 | |  $\Delta \mathbf{x}^l = \gamma(-\mathbf{x}^l + \mathbf{m}^l f'(\mathbf{x}^{l+1}) + \mathbf{w}^{l-1} f'(\mathbf{x}^{l-1}))$ ;
23 | |  $\mathbf{x}^l = \mathbf{x}^l + \Delta \mathbf{x}^l$ ;
24 | end
25 end
26 for  $l = 1; l < L + 1; l = l + 1$  do // Update weights (positive phase)
27 |  $\Delta \mathbf{w}^l = \alpha f(\mathbf{x}^{l+1}) (f(\mathbf{x}^l))^T$ ;
28 |  $\mathbf{w}^l = \mathbf{w}^l + \Delta \mathbf{w}^l$ ;
29 |  $\Delta \mathbf{m}^l = \alpha f(\mathbf{x}^l) (f(\mathbf{x}^{l+1}))^T$ ;
30 |  $\mathbf{m}^l = \mathbf{m}^l + \Delta \mathbf{m}^l$ ;
31 end

```

---

1223

1224 **2.2 Target alignment for networks without hidden layers (Fig. 3d)**

1225 Fig. 3d shows that target alignment for models without hidden layers, trained either with PC or BP, is  
1226 exactly one, and here we prove this property analytically. Without hidden layers, PC and BP are identical  
1227 algorithms. In a linear network, the change of the weight  $\mathbf{w}^1$  is:

$$\Delta \mathbf{w}^1 \sim \boldsymbol{\varepsilon}^2 (\mathbf{x}^1)^T \quad (16)$$

1228 We denote output after learning by  $\mathbf{x}'^2$ . The change of the output  $\mathbf{x}'^2 - \mathbf{x}^2$  is:

$$\mathbf{x}'^2 - \mathbf{x}^2 = \mathbf{w}'^2 \mathbf{x}^1 - \mathbf{w}^2 \mathbf{x}^1 \quad (17)$$

$$= \Delta \mathbf{w}^1 \mathbf{x}^1 \quad (18)$$

$$\sim \boldsymbol{\epsilon}^2 (\mathbf{x}^1)^T \mathbf{x}^1 \quad (19)$$

1229 Here  $(\mathbf{x}^1)^T \mathbf{x}^1$  is a positive scalar (if at least one entry in  $\mathbf{x}^1$  is non-zero). Thus,

$$\mathbf{x}'^2 - \mathbf{x}^2 \sim \boldsymbol{\epsilon}^2 \quad (20)$$

1230 According to the definition of target alignment, which is the cosine similarity of the direction of the target  
1231 (i.e.,  $\boldsymbol{\epsilon}^2$ ) and the direction of learning (i.e.,  $\mathbf{x}'^2 - \mathbf{x}^2$ ), target alignment of this network is exactly one. This  
1232 conclusion also applies to network with nonlinear activation function.

### 1233 2.3 Formal proofs of prospective index of PCN (Extended Data Fig. 1)

1234 This section formally proves two properties of the prospective index  $\phi^l$  of *predictive coding network*<sup>30,43,55</sup>  
1235 (PCN), that can be observed in Extended Data Fig. 1d. To briefly recap, prospective index  $\phi^l$  quantifies to  
1236 what extent the hidden neural activity of the network following clamping output neurons to a target pattern  
1237 is shifting toward the hidden neural activity following subsequent weight modification. Below we show  
1238 two properties visible in Extended Data Fig. 1d. Firstly, prospective index of the first hidden layer ( $\phi^2$ ) in  
1239 a PCN is always one. Secondly, the prospective index in other layer is close to one because, the weights  
1240  $\mathbf{W}$  in PCN are updated towards a configuration  $\mathbf{W}^*$  whose prospective index is one.

#### 1241 2.3.1 Prospective index of the first hidden layer of PCN is always one

1242 We assume that the model does not make a perfect prediction with the current weights, so that the error  
1243 in the prediction drives the learning. As defined in Extended Data Fig. 1a, vectors  $\mathbf{v}^{\oplus,l}$  and  $\mathbf{v}'^l$  describe  
1244 the changes in hidden neuron activity, due to target pattern being provided and learning respectively.  
1245 Specifically for layer  $l = 2$ , these vectors are:

$$\mathbf{v}^{\oplus,2} = \mathbf{x}_{\mathbf{W}}^{\oplus,2} - \mathbf{x}_{\mathbf{W}}^{\ominus,2} \quad (21)$$

1246

$$\mathbf{v}'^2 = \mathbf{x}_{\mathbf{W}'}^{\ominus,2} - \mathbf{x}_{\mathbf{W}}^{\ominus,2} \quad (22)$$

1247 We will now show that for PCN the above vectors  $\mathbf{v}^{\oplus,2}$  and  $\mathbf{v}'^2$  point in the same direction. The change in  
1248 activity due to learning  $\mathbf{v}'^2$  is equal to

$$\mathbf{v}'^2 = \mathbf{w}'^1 f(\mathbf{x}_{\mathbf{W}'}^{\ominus,1}) - \mathbf{w}^1 f(\mathbf{x}_{\mathbf{W}}^{\ominus,1}) \quad (23)$$

1249 Since the value nodes of the first (input) layer  $\mathbf{x}^1$  are always fixed to the input signal  $\mathbf{s}^{\text{in}}$ , the above Eq. (23)  
1250 can further be written as,

$$\begin{aligned} \mathbf{v}'^2 &= \mathbf{w}'^1 f(\mathbf{s}^{\text{in}}) - \mathbf{w}^1 f(\mathbf{s}^{\text{in}}) \\ &= (\mathbf{w}'^1 - \mathbf{w}^1) f(\mathbf{s}^{\text{in}}) \\ &= \Delta \mathbf{w}^1 f(\mathbf{s}^{\text{in}}) \end{aligned} \quad (24)$$

1251 Using Eqs. (13) and (11), we write

$$\mathbf{v}'^{,2} = \alpha \left( \mathbf{x}_{\mathbf{W}}^{\oplus,2} - \hat{\mathbf{x}}_{\mathbf{W}}^{\oplus,2} \right) \left( f \left( \mathbf{s}^{\text{in}} \right) \right)^T f \left( \mathbf{s}^{\text{in}} \right) \quad (25)$$

1252 In Eq. (25),  $\hat{\mathbf{x}}^l$  denotes inputs to neurons in layer  $l$ , i.e.,  $\hat{\mathbf{x}}^l = \mathbf{w}^{l-1} f \left( \mathbf{x}^{l-1} \right)$ . Note that  $\hat{\mathbf{x}}_{\mathbf{W}}^{\oplus,2} = \mathbf{x}_{\mathbf{W}}^{\ominus,2}$ , because  
 1253 both of these quantities are equal to  $\mathbf{w}^1 f \left( \mathbf{s}^{\text{in}} \right)$  (the input of the first hidden layer ( $l = 2$ ) does not change  
 1254 in response to output neuron being clamped). Using  $\hat{\mathbf{x}}_{\mathbf{W}}^{\oplus,2} = \mathbf{x}_{\mathbf{W}}^{\ominus,2}$ , the above Eq. (25) can further be written  
 1255 as,

$$\mathbf{v}'^{,2} = \left( \mathbf{x}_{\mathbf{W}}^{\oplus,2} - \mathbf{x}_{\mathbf{W}}^{\ominus,2} \right) \alpha \left( f \left( \mathbf{s}^{\text{in}} \right) \right)^T f \left( \mathbf{s}^{\text{in}} \right) \quad (26)$$

1256 Note that  $\alpha \left( f \left( \mathbf{s}^{\text{in}} \right) \right)^T f \left( \mathbf{s}^{\text{in}} \right)$  is a positive scalar (if at least one entry in the input pattern is non-zero).  
 1257 Comparing Eqs. (21) and (26), we can see that vectors  $\mathbf{v}'^{,2}$  and  $\mathbf{v}^{\oplus,2}$  are just scaled versions of each other,  
 1258 hence the cos of the angle between them is equal to 1, and thus prospective index is also equal to 1 (in the  
 1259 limit of  $\kappa \rightarrow 0$ ).

### 1260 2.3.2 Weights in PCN are updated towards a configuration with prospective index of one

1261 As seen in Extended Data Fig. 1d, the prospective index for layers  $l > 2$  is very close to one. To provide  
 1262 an intuition for why this is the case, in this section we demonstrate how PCNs would need to be modified  
 1263 to have prospective index equal to 1. We will refer to such modified model as target-PCN, and calculate its  
 1264 prospective index.

1265 As in the previous section, we assume that the model does not make a perfect prediction with the current  
 1266 weights, so that the error in the prediction drives the learning. We start with recapping what happens in  
 1267 sequence in one iteration of the standard PCN.

- 1268 1. Start from relaxation with only input neurons clamped to input pattern ( $\ominus$ ) and with current weight  
 1269  $\mathbf{W}$ , the hidden neuron activity settles to:  $\mathbf{x}_{\mathbf{W}}^{\ominus,l}$
- 1270 2. Both input and output neurons are clamped to the input and target pattern respectively ( $\oplus$ ) and then  
 1271 the hidden neuron activity is relaxed to:  $\mathbf{x}_{\mathbf{W}}^{\oplus,l}$
- 1272 3. Weights  $\mathbf{W}$  are updated for one step to  $\mathbf{W}'$  to decrease the energy, while hidden neuron activity stays  
 1273 still from the last step:  $\mathbf{x}_{\mathbf{W}}^{\oplus,l}$
- 1274 4. Output neurons are freed but the input neuron is still clamped to the input pattern and then the  
 1275 hidden neuron activity is relaxed to:  $\mathbf{x}_{\mathbf{W}'}^{\ominus,l}$

1276 In the above step 3, weights are updated for one step from  $\mathbf{W}$  to  $\mathbf{W}'$ . However, one can investigate the  
 1277 case of updating weights  $\mathbf{W}$  for many steps until convergence  $\mathbf{W}^*$  in the above step 3. This will result in  
 1278 weights  $\mathbf{W}^*$  that represents: “the target towards which the weights  $\mathbf{W}$  are updated”. Thus, we call this  
 1279 variant “target-PCN” and it is summarized in Algorithm 8. Specifically, the procedure of target-PCN is to  
 1280 replace the above steps 3 and 4 of standard PCN with:

- 1281 3. Weights are updated for many steps from  $\mathbf{W}$  to  $\mathbf{W}^*$  to decrease the energy till convergence, while  
 1282 hidden neuron activity stays still from the last step:  $\mathbf{x}_{\mathbf{W}}^{\oplus,l}$ ;
- 1283 4. Output neurons are freed but the input neuron is still clamped to the input pattern and then the  
 1284 hidden neuron activity is relaxed to:  $\mathbf{x}_{\mathbf{W}^*}^{\ominus,l}$ ;

---

**Algorithm 8:** Learn with target-PCN

---

**Input:** input pattern  $\mathbf{s}^{\text{in}}$ ; target pattern  $\mathbf{s}^{\text{target}}$ ; synaptic weights  $\{\mathbf{w}^1, \mathbf{w}^2, \dots, \mathbf{w}^L\}$   
**Output:** updated synaptic weights  $\{\mathbf{w}^1, \mathbf{w}^2, \dots, \mathbf{w}^L\}$

```

1  $\mathbf{x}^1 = \mathbf{s}^{\text{in}}$ ; // Clamp input neurons to input pattern
2  $\mathbf{x}^{L+1} = \mathbf{s}^{\text{target}}$ ; // Clamp output neurons to target pattern
3 for  $t = 0; t < \mathcal{T}; t = t + 1$  do // Relaxation
4   for  $l = 1; l < L + 1; l = l + 1$  do
5      $\hat{\mathbf{x}}^{l+1} = \mathbf{w}^l f(\mathbf{x}^l)$ ;
6      $\boldsymbol{\varepsilon}^{l+1} = \mathbf{x}^{l+1} - \hat{\mathbf{x}}^{l+1}$ ;
7   end
8   for  $l = 2; l < L + 1; l = l + 1$  do
9      $\Delta \mathbf{x}^l = \gamma \left( -\boldsymbol{\varepsilon}^l + f'(\mathbf{x}^l) \circ \left( (\mathbf{w}^l)^T \boldsymbol{\varepsilon}^{l+1} \right) \right)$ ;
10     $\mathbf{x}^l = \mathbf{x}^l + \Delta \mathbf{x}^l$ ;
11  end
12 end
13 while  $\{\mathbf{w}^1, \mathbf{w}^2, \dots, \mathbf{w}^L\}$  not converged do // Update weights till convergence
14   for  $l = 1; l < L + 1; l = l + 1$  do
15      $\hat{\mathbf{x}}^{l+1} = \mathbf{w}^l f(\mathbf{x}^l)$ ;
16      $\boldsymbol{\varepsilon}^{l+1} = \mathbf{x}^{l+1} - \hat{\mathbf{x}}^{l+1}$ ;
17   end
18   for  $l = 1; l < L + 1; l = l + 1$  do // Update weights
19      $\Delta \mathbf{w}^l = \alpha \boldsymbol{\varepsilon}^{l+1} (f(\mathbf{x}^l))^T$ ;
20      $\mathbf{w}^l = \mathbf{w}^l + \Delta \mathbf{w}^l$ ;
21   end
22 end

```

---

1285

1286 In the following, we demonstrate prospective index of target-PCN is one for all layers. First, we should  
 1287 notice that the minimum of energy  $E$  of PCN is zero, since the energy function is a sum of quadratic terms,  
 1288 i.e., Eq. (6). Then, we should notice that such energy  $E$  of PCN can be optimized to its minimum of zero  
 1289 by optimizing only  $\mathbf{W}$ . Particularly, the local energy term of layer  $l$  is:

$$\begin{aligned} \frac{1}{2} (\boldsymbol{\varepsilon}^l)^T \boldsymbol{\varepsilon}^l &= \frac{1}{2} (\mathbf{x}^l - \hat{\mathbf{x}}^l)^T (\mathbf{x}^l - \hat{\mathbf{x}}^l) \\ &= \frac{1}{2} (\mathbf{x}^l - \mathbf{w}^{l-1} f(\mathbf{x}^{l-1}))^T (\mathbf{x}^l - \mathbf{w}^{l-1} f(\mathbf{x}^{l-1})) \end{aligned} \quad (27)$$

1290 In the above Eq.,  $\mathbf{x}^l - \mathbf{w}^{l-1} f(\mathbf{x}^{l-1})$  can be optimized to produce a zero vector by optimizing only  $\mathbf{w}^{l-1}$ ,  
 1291 as long as  $f(\mathbf{x}^{l-1})$  is not a zero vector. Specifically, let us denote all the non-zero entries in  $f(\mathbf{x}^{l-1})$  by  
 1292  $\{f(x_i^{l-1})\}_{i \in I}$ , where  $I$  is the set of indices  $i$  so that  $f(x_i^{l-1})$  is non-zero. Since  $f(\mathbf{x}^{l-1})$  is not a zero  
 1293 vector,  $I \neq \emptyset$ . To demonstrate that there exists a solution for  $\{w_{j,i}^{l-1}\}_{i \in I}$  so that  $x_j^l = \sum_{i \in I} w_{j,i}^{l-1} f(x_i^{l-1})$ ,  
 1294 we construct an example of such solution. Such sample solution is to pick one index  $g$  from  $I$ , then have  
 1295  $w_{j,g}^{l-1} = \frac{x_j^l}{f(x_i^{l-1})}$  and  $\{w_{j,i}^{l-1} = 0 : i \in I, i \notin \{g\}\}$ . Thus, as long as  $f(\mathbf{x}^{l-1})$  is not a zero vector ( $I \neq \emptyset$ ), there  
 1296 exists a solution of  $\mathbf{w}^{l-1}$  that makes  $\mathbf{x}^l - \mathbf{w}^{l-1} f(\mathbf{x}^{l-1})$  a zero vector.

1297 Thus, in step 3 of the target-PCN, the energy of the network is at its minimum of zero. This further  
 1298 implies that in the step 4 of the target-PCN, the neural activity does not move, i.e.,

$$\mathbf{x}_{\mathbf{W}^*}^{\ominus,l} = \mathbf{x}_{\mathbf{W}}^{\oplus,l} \quad (28)$$

1299 According to the definition of prospective index in Extended Data Fig. 1a-b, the prospective index of this  
 1300 target-PCN ( $\phi^{*,l}$ ) is:

$$\begin{aligned} \phi^{*,l} &= \frac{\mathbf{v}^{\oplus,l} \cdot \mathbf{v}^{*,l}}{(\|\mathbf{v}^{\oplus,l}\| + \kappa)(\|\mathbf{v}^{*,l}\| + \kappa)} \\ &\approx \cos(\mathbf{v}^{\oplus,l}, \mathbf{v}^{*,l}) \\ &= \cos\left(\overrightarrow{\mathbf{x}_{\mathbf{W}}^{\ominus,l} \mathbf{x}_{\mathbf{W}}^{\oplus,l}}, \overrightarrow{\mathbf{x}_{\mathbf{W}}^{\ominus,l} \mathbf{x}_{\mathbf{W}^*}^{\oplus,l}}\right) \\ &= \cos\left(\overrightarrow{\mathbf{x}_{\mathbf{W}}^{\ominus,l} \mathbf{x}_{\mathbf{W}}^{\oplus,l}}, \overrightarrow{\mathbf{x}_{\mathbf{W}}^{\ominus,l} \mathbf{x}_{\mathbf{W}}^{\oplus,l}}\right) \text{ according to Eq. (28)} \\ &= 1 \end{aligned} \quad (29)$$

1301 This theoretical result is further confirmed by empirical observation in Extended Data Fig. 1d. Since  
 1302 the standard PCN modifies the weights in a similar direction as target-PCN, it is likely to have a similar  
 1303 prospective index.

## 1304 2.4 Relationships of predictive coding networks to target propagation (Extended Data Fig. 2)

1305 In Extended Data Fig. 2, we illustrate that prospective configuration, particularly, *predictive coding*  
 1306 *network*<sup>30,43,55</sup> (PCN), has close a relationship to a separate and influential model of credit assignment –  
 1307 target propagation<sup>60</sup>. Here we formally prove these observations. Particularly, we show that

- 1308 • In an output-constrained PCN, neural activity after relaxation converges to the local target;
- 1309 • In an input-output-constrained PCN, neural activity after relaxation converges to the weighted sum  
 1310 of the predicting activity and the local target.

1311 In the above, predicting activity refer to the neural activity when the model is making prediction, and they  
 1312 are the same for both backpropagation and PCN as they compute the same neural activity when making a  
 1313 prediction, and local target are described in the following subsection.

### 1314 2.4.1 Target-propagation

1315 We first briefly review target propagation<sup>60</sup>. The key insight behind target propagation is that rather  
 1316 than updating weights based on a gradient of a loss function, one can instead attempt to explicitly  
 1317 compute what are the optimal activity for the neurons so that they can produce the desired target pattern,  
 1318 and then update the weights so as to nudge the current neural activity towards the optimal activity  
 1319 directly. We call these optimal activity *local target* since if the neurons takes this activity, the network  
 1320 would produce the desired target pattern. Importantly, we can directly compute the local target in terms  
 1321 of the *inverses* of the weights and activation functions. Namely, suppose that we have a three-layer  
 1322 network with activation functions  $f(\cdot)$ , weight matrices  $\mathbf{w}^1, \mathbf{w}^2, \mathbf{w}^3$  and an input pattern  $\mathbf{s}^{\text{in}}$ . The output  
 1323 of this network is  $\mathbf{x}^4 = \mathbf{w}^3 f(\mathbf{w}^2 f(\mathbf{w}^1 f(\mathbf{s}^{\text{in}})))$ . Suppose instead that we do not want the network to  
 1324 output  $\mathbf{x}^4$  for a given  $\mathbf{s}^{\text{in}}$  but rather a given target pattern  $\mathbf{s}^{\text{target}}$ . Then, the activity at the first layer



1325  $\tilde{\mathbf{x}}^1$  that would produce this desired activity can be exactly computed by inverting<sup>1</sup> the network  $\tilde{\mathbf{x}}^1 =$   
 1326  $f^{-1} \left( (\mathbf{w}^1)^{-1} f^{-1} \left( (\mathbf{w}^2)^{-1} f^{-1} \left( (\mathbf{w}^3)^{-1} \mathbf{s}^{\text{target}} \right) \right) \right)$ . From this, we can define a recursion of one local  
 1327 target in terms of another at the layer above,

$$\begin{aligned} \tilde{\mathbf{x}}^l &= f^{-1} \left( (\mathbf{w}^l)^{-1} \tilde{\mathbf{x}}^{l+1} \right) \\ \tilde{\mathbf{x}}^{L+1} &= \mathbf{s}^{\text{target}} \end{aligned} \quad (30)$$

1328 Like prospective configuration, these targets are also *prospective*, in some sense, since they represent the  
 1329 counterfactual what the neural activity *should have been* in order to produce the desired target pattern.

#### 1330 2.4.2 Output-constrained PCN

1331 In this subsection we investigate the “output-constrained PCN”: in this PCN input neurons are not clamped  
 1332 to the input pattern but output neurons are clamped to the target pattern. We show that in this PCN, the  
 1333 activity after relaxation is precisely equal to the local target. Since  $\mathbf{x}^1$  is not constrained to the input pattern,  
 1334 we can look at its dynamic by setting  $l = 1$  in Eq. (12). Since there is no error term or error nodes at the  
 1335 input layer, there is only the later term left when setting  $l = 1$  in Eq. (12) (note that here we write in matrix  
 1336 & vector form):

$$\Delta \mathbf{x}^1 = \gamma f'(\mathbf{x}^1) \circ \left( (\mathbf{w}^1)^T \boldsymbol{\varepsilon}^2 \right) \quad (31)$$

$$= \gamma f'(\mathbf{x}^1) \circ \left( (\mathbf{w}^1)^T (\mathbf{x}^2 - \mathbf{w}^1 f(\mathbf{x}^1)) \right) \quad (32)$$

1337 Considering the above dynamic has converged, we can set  $\Delta \mathbf{x}^1 = \mathbf{0}$  in the above equation and solving for  
 1338  $\mathbf{x}^1$ , then we can obtain the converged value of  $\mathbf{x}^1$ :

$$\mathbf{x}^1 = f^{-1} \left( (\mathbf{w}^1)^{-1} \mathbf{x}^2 \right) \quad (33)$$

1339 Now we look at the dynamic of  $\mathbf{x}^2$  by setting  $l = 2$  in Eq. (12):

$$\Delta \mathbf{x}^2 = \gamma \left( -\boldsymbol{\varepsilon}^2 + f'(\mathbf{x}^2) \circ \left( (\mathbf{w}^2)^T \boldsymbol{\varepsilon}^3 \right) \right) \quad (34)$$

$$= \gamma \left( -(\mathbf{x}^2 - \mathbf{w}^1 f(\mathbf{x}^1)) + f'(\mathbf{x}^2) \circ \left( (\mathbf{w}^2)^T (\mathbf{x}^3 - \mathbf{w}^2 f(\mathbf{x}^2)) \right) \right) \quad (35)$$

1340 Putting the solved  $\mathbf{x}^1$ , i.e., Eq. (33), into the above Eq., we have:

$$\Delta \mathbf{x}^2 = \gamma f'(\mathbf{x}^2) \circ \left( (\mathbf{w}^2)^T (\mathbf{x}^3 - \mathbf{w}^2 f(\mathbf{x}^2)) \right) \quad (36)$$

1341 Considering the above dynamic has converged, we can set  $\Delta \mathbf{x}^2 = \mathbf{0}$  in the above equation and solving for  
 1342  $\mathbf{x}^2$ , then we can obtain the converged value of  $\mathbf{x}^2$ :

$$\mathbf{x}^2 = f^{-1} \left( (\mathbf{w}^2)^{-1} \mathbf{x}^3 \right) \quad (37)$$

---

<sup>1</sup>Note that in realistic networks the weight matrices are not all square so an exact inverse  $(\mathbf{w}^l)^{-1}$  does not exist. Instead, we can compute approximations of the inverse using the Moore-Penrose pseudoinverse<sup>115</sup>  $(\mathbf{w}^l)^\dagger$ , which is the least squares solution to the optimization problem  $\arg \min_{\mathbf{w}} \|\mathbf{I} - \mathbf{w}^l \mathbf{w}\|$ .

1343 One can now see the proof goes recursively until  $l = L$  and  $\mathbf{x}^{L+1}$  is fixed to the target pattern  $\mathbf{s}^{\text{target}}$ :

$$\begin{aligned} \mathbf{x}^l &= f^{-1} \left( \left( \mathbf{w}^l \right)^{-1} \mathbf{x}^{l+1} \right) \\ \mathbf{x}^{L+1} &= \mathbf{s}^{\text{target}} \end{aligned} \quad (38)$$

1344 which is exactly the recursive formula of the local target in target propagation, i.e., Eq. (30). Thus, neural  
1345 activity of output-constrained PCN after relaxation equals to the local target.

### 1346 2.4.3 Input-output-constrained PCN

1347 In this subsection we investigate the ‘‘input-output-constrained PCN’’: in this PCN both input and output  
1348 neurons are clamped to the input and target patterns, respectively. We show that in this PCN, the activity  
1349 after relaxation are the weighted sum of the predicting activity and the local target. Particularly, since in  
1350 an input-output-constrained PCN, we can only solve for the equilibrium after relaxation analytically in  
1351 the linear case, we prove this for a linear PCN. Nevertheless, the analysis still provides useful insights.  
1352 Looking at the network dynamics at a given layer  $l$ , i.e., Eq. (12), we can write the dynamics in the linear  
1353 case as,

$$\Delta \mathbf{x}^l = \gamma \left( - \left( \mathbf{x}^l - \mathbf{w}^{l-1} \mathbf{x}^{l-1} \right) + \left( \mathbf{w}^l \right)^T \left( \mathbf{x}^{l+1} - \mathbf{w}^l \mathbf{x}^l \right) \right) \quad (39)$$

1354 If we then set  $\Delta \mathbf{x}^l = \mathbf{0}$  and solve for  $\mathbf{x}^l$ , we obtain,

$$\Delta \mathbf{x}^l = \mathbf{0} \implies - \left( \mathbf{x}^l - \mathbf{w}^{l-1} \mathbf{x}^{l-1} \right) + \left( \mathbf{w}^l \right)^T \left( \mathbf{x}^{l+1} - \mathbf{w}^l \mathbf{x}^l \right) = \mathbf{0} \quad (40)$$

$$\implies -\mathbf{x}^l + \mathbf{w}^{l-1} \mathbf{x}^{l-1} + \left( \mathbf{w}^l \right)^T \mathbf{x}^{l+1} - \left( \mathbf{w}^l \right)^T \mathbf{w}^l \mathbf{x}^l = \mathbf{0} \quad (41)$$

$$\implies \mathbf{x}^l + \left( \mathbf{w}^l \right)^T \mathbf{w}^l \mathbf{x}^l = \mathbf{w}^{l-1} \mathbf{x}^{l-1} + \left( \mathbf{w}^l \right)^T \mathbf{x}^{l+1} \quad (42)$$

$$\implies \left( \mathbf{I} + \left( \mathbf{w}^l \right)^T \mathbf{w}^l \right) \mathbf{x}^l = \mathbf{w}^{l-1} \mathbf{x}^{l-1} + \left( \mathbf{w}^l \right)^T \mathbf{x}^{l+1} \quad (43)$$

$$\implies \mathbf{x}^l = \left( \mathbf{I} + \left( \mathbf{w}^l \right)^T \mathbf{w}^l \right)^{-1} \left( \mathbf{w}^{l-1} \mathbf{x}^{l-1} + \left( \mathbf{w}^l \right)^T \mathbf{x}^{l+1} \right) \quad (44)$$

1355 If we assume that the norm of the weights is large compared to the identity matrix  $\mathbf{I}$ , i.e., we consider  
1356  $\left( \mathbf{I} + \left( \mathbf{w}^l \right)^T \mathbf{w}^l \right)^{-1} \approx \left( \left( \mathbf{w}^l \right)^T \mathbf{w}^l \right)^{-1}$ , the above equilibrium solution can further be approximated by:

$$\implies \mathbf{x}^l \approx \left( \left( \mathbf{w}^l \right)^T \mathbf{w}^l \right)^{-1} \left( \mathbf{w}^{l-1} \mathbf{x}^{l-1} + \left( \mathbf{w}^l \right)^T \mathbf{x}^{l+1} \right) \quad (45)$$

$$\implies \mathbf{x}^l \approx \left( \left( \mathbf{w}^l \right)^T \mathbf{w}^l \right)^{-1} \underbrace{\mathbf{w}^{l-1} \mathbf{x}^{l-1}}_{\substack{\text{predicting activity} \\ \text{for backpropagation and PCN}}} + \underbrace{\left( \mathbf{w}^l \right)^{-1} \mathbf{x}^{l+1}}_{\substack{\text{local target} \\ \text{from target propagation}}} \quad (46)$$

1357 where the equilibrium solution is simply the weighted sum of the predicting activity and the local target.

1358 These theoretical results let us view prospective configuration from another angle. Namely, that  
1359 prospective configuration tends to move the activity from the predicting activity towards the local target

1360 that would be computed by target propagation. These local target are intrinsically prospective in the sense  
1361 that they are the neural activity which, if they were produced, they would minimize the loss function (i.e.,  
1362 produce the desired target pattern). In other words, they are in some sense the activity which the weight  
1363 updates of a network are trying to achieve. By moving towards these local target directly in activity-space,  
1364 as opposed to only in weight-space like backpropagation, the prospective configuration can often propose  
1365 faster and more efficient updates than can be achieved by backpropagation.
